# Supplementary material for: Synthesis, structures and cytotoxic effects in vitro of cis- and trans-[PtIVCl4(NHC)2] complexes and their PtII precursors
Source: Royal Society of Chemistry journal article supplement (doi:10.1039/c9dt02438g), 2019-01-01
Supplement: c9dt02438g1.pdf [file c9dt02438g1.pdf]

## Electronic Supporting Information

# Synthesis, structures and cytotoxic effects *in vitro* of *cis*- and *trans*-[Pt<sup>IV</sup>Cl<sub>4</sub>(NHC)<sub>2</sub>] complexes and their Pt<sup>II</sup> precursors

Tobias Rehm,<sup>a</sup> Matthias Rothemund,<sup>a</sup> Thomas Dietel,<sup>b</sup> Rhett Kempe<sup>b</sup> and Rainer Schobert<sup>a</sup>

<sup>a</sup>Organic Chemistry Laboratory, University Bayreuth, Universitaetsstrasse 30, 95440 Bayreuth, Germany. E-mail: Rainer.Schobert@uni-bayreuth.de

<sup>b</sup>Lehrstuhl fuer Anorganische Chemie II, University Bayreuth, Universitaetsstrasse 30, 95440 Bayreuth, Germany.

### Table of content

|                                                                                                                                     |         |
|-------------------------------------------------------------------------------------------------------------------------------------|---------|
| Single crystal X-ray diffraction data of complexes <b>2c</b> and <b>3</b> (Table S1)                                                | S2      |
| NMR spectra of complexes <b>2a-d</b> , <i>trans</i> - <b>2c</b> , <b>3</b> , <b>4a-d</b> and <i>trans</i> - <b>4c</b> (Fig. S1-S30) | S3–S17  |
| Oxidation of complex <b>2b</b> with NaOCl                                                                                           | S18–S21 |
| Stability of complex <b>4b</b> in DMSO / water                                                                                      | S22–S24 |
| Confirmative MTT-assays with <b>2c</b> / <b>2d</b> (Table S2)                                                                       | S25     |

Table S 1: Single crystal X-ray diffraction data of platinum carbene complexes **2c** and **3**.

| Crystal data                                                                                                            | <b>2c</b>                                                                                                                  | <b>3</b>                                                                                                  |
|-------------------------------------------------------------------------------------------------------------------------|----------------------------------------------------------------------------------------------------------------------------|-----------------------------------------------------------------------------------------------------------|
| Chemical formula                                                                                                        | C <sub>30</sub> H <sub>44</sub> Cl <sub>2</sub> N <sub>4</sub> Pt·CHCl <sub>3</sub>                                        | C <sub>34</sub> H <sub>32</sub> Cl <sub>4</sub> N <sub>4</sub> Pt·2(CH <sub>2</sub> Cl <sub>2</sub> )     |
| <i>M<sub>r</sub></i>                                                                                                    | 846.07                                                                                                                     | 983.87                                                                                                    |
| Crystal system, space group                                                                                             | Triclinic, P                                                                                                               | Monoclinic, C2/c                                                                                          |
| Temperature (K)                                                                                                         | 133                                                                                                                        | 133                                                                                                       |
| <i>a</i> , <i>b</i> , <i>c</i> (Å)                                                                                      | 8.6162 (17), 12.200 (2), 17.892 (4)                                                                                        | 24.684 (5), 8.277 (5), 22.505 (5)                                                                         |
| $\alpha$ , $\beta$ , $\gamma$ (°)                                                                                       | 104.49 (3), 95.13 (3), 104.88 (3)                                                                                          | 121.662 (5)                                                                                               |
| <i>V</i> (Å <sup>3</sup> )                                                                                              | 1736.1 (7)                                                                                                                 | 3914 (3)                                                                                                  |
| <i>Z</i>                                                                                                                | 2                                                                                                                          | 4                                                                                                         |
| <i>F</i> (000)                                                                                                          | 842.5                                                                                                                      | 1945                                                                                                      |
| <i>D<sub>x</sub></i> (Mg m <sup>-3</sup> )                                                                              | 1.618                                                                                                                      | 1.670                                                                                                     |
| Radiation type                                                                                                          | Mo K $\alpha$                                                                                                              | Mo K $\alpha$                                                                                             |
| No. of reflections for cell measurement                                                                                 | 1222                                                                                                                       | 8743                                                                                                      |
| $\theta$ range (°) for cell measurement                                                                                 | 5.7–25.8                                                                                                                   | 1.9–28.3                                                                                                  |
| $\mu$ (mm <sup>-1</sup> )                                                                                               | 4.45                                                                                                                       | 3.81                                                                                                      |
| Crystal shape                                                                                                           | Block                                                                                                                      | Block                                                                                                     |
| Colour                                                                                                                  | Clear colourless                                                                                                           | Colourless                                                                                                |
| Crystal size (mm)                                                                                                       | 0.07 × 0.01 × 0.004                                                                                                        | 0.21 × 0.12 × 0.09                                                                                        |
| <b>Data collection</b>                                                                                                  |                                                                                                                            |                                                                                                           |
| Diffractometer                                                                                                          | STOE-STADIVARI                                                                                                             | STOE-STADIVARI                                                                                            |
| Scan method                                                                                                             | $\omega$ scans                                                                                                             | $\omega$ scan                                                                                             |
| Absorption correction                                                                                                   | Numerical                                                                                                                  | Numerical                                                                                                 |
| <i>T<sub>min</sub></i> , <i>T<sub>max</sub></i>                                                                         | 0.613, 0.733                                                                                                               | 0.841, 0.912                                                                                              |
| No. of measured, independent and observed [ <i>I</i> > 2 $\sigma$ ( <i>I</i> )] reflections                             | 20838, 8234, 7605                                                                                                          | 10695, 3414, 2307                                                                                         |
| <i>R<sub>int</sub></i>                                                                                                  | 0.015                                                                                                                      | 0.077                                                                                                     |
| $\theta$ values (°)                                                                                                     | $\theta_{\max}$ = 28.5, $\theta_{\min}$ = 1.8                                                                              | $\theta_{\max}$ = 25.0, $\theta_{\min}$ = 2.0                                                             |
| ( $\sin \theta/\lambda$ ) <sub>max</sub> (Å <sup>-1</sup> )                                                             | 0.671                                                                                                                      | 0.595                                                                                                     |
| Range of <i>h</i> , <i>k</i> , <i>l</i>                                                                                 | <i>h</i> = -11 → 7<br><i>k</i> = -16 → 16<br><i>l</i> = -23 → 22                                                           | <i>h</i> = -29 → 29<br><i>k</i> = -5 → 9<br><i>l</i> = -26 → 22                                           |
| <b>Refinement</b>                                                                                                       |                                                                                                                            |                                                                                                           |
| Refinement on                                                                                                           | <i>F</i> <sup>2</sup>                                                                                                      | <i>F</i> <sup>2</sup>                                                                                     |
| <i>R</i> [ <i>F</i> <sup>2</sup> > 2 $\sigma$ ( <i>F</i> <sup>2</sup> )], <i>wR</i> ( <i>F</i> <sup>2</sup> ), <i>S</i> | 0.018, 0.038, 1.04                                                                                                         | 0.055, 0.163, 0.99                                                                                        |
| No. of reflections                                                                                                      | 8234                                                                                                                       | 3414                                                                                                      |
| No. of parameters                                                                                                       | 374                                                                                                                        | 223                                                                                                       |
| No. of restraints                                                                                                       | 0                                                                                                                          | 18                                                                                                        |
| H-atom treatment                                                                                                        | H-atom parameters constrained                                                                                              | H-atom parameters constrained                                                                             |
| Weighting scheme                                                                                                        | $w = 1/[\sigma^2(\text{Fo}^2) + (0.0198\text{P})^2 + 0.8853\text{P}]$<br>where P = (Fo <sup>2</sup> + 2Fc <sup>2</sup> )/3 | $w = 1/[\sigma^2(\text{Fo}^2) + (0.1072\text{P})^2]$<br>where P = (Fo <sup>2</sup> + 2Fc <sup>2</sup> )/3 |
| ( $\Delta/\sigma$ ) <sub>max</sub>                                                                                      | < 0.001                                                                                                                    | < 0.001                                                                                                   |
| $\Delta\rho_{\max}$ , $\Delta\rho_{\min}$ (e Å <sup>-3</sup> )                                                          | 0.62, -0.54                                                                                                                | 2.14, -2.78                                                                                               |

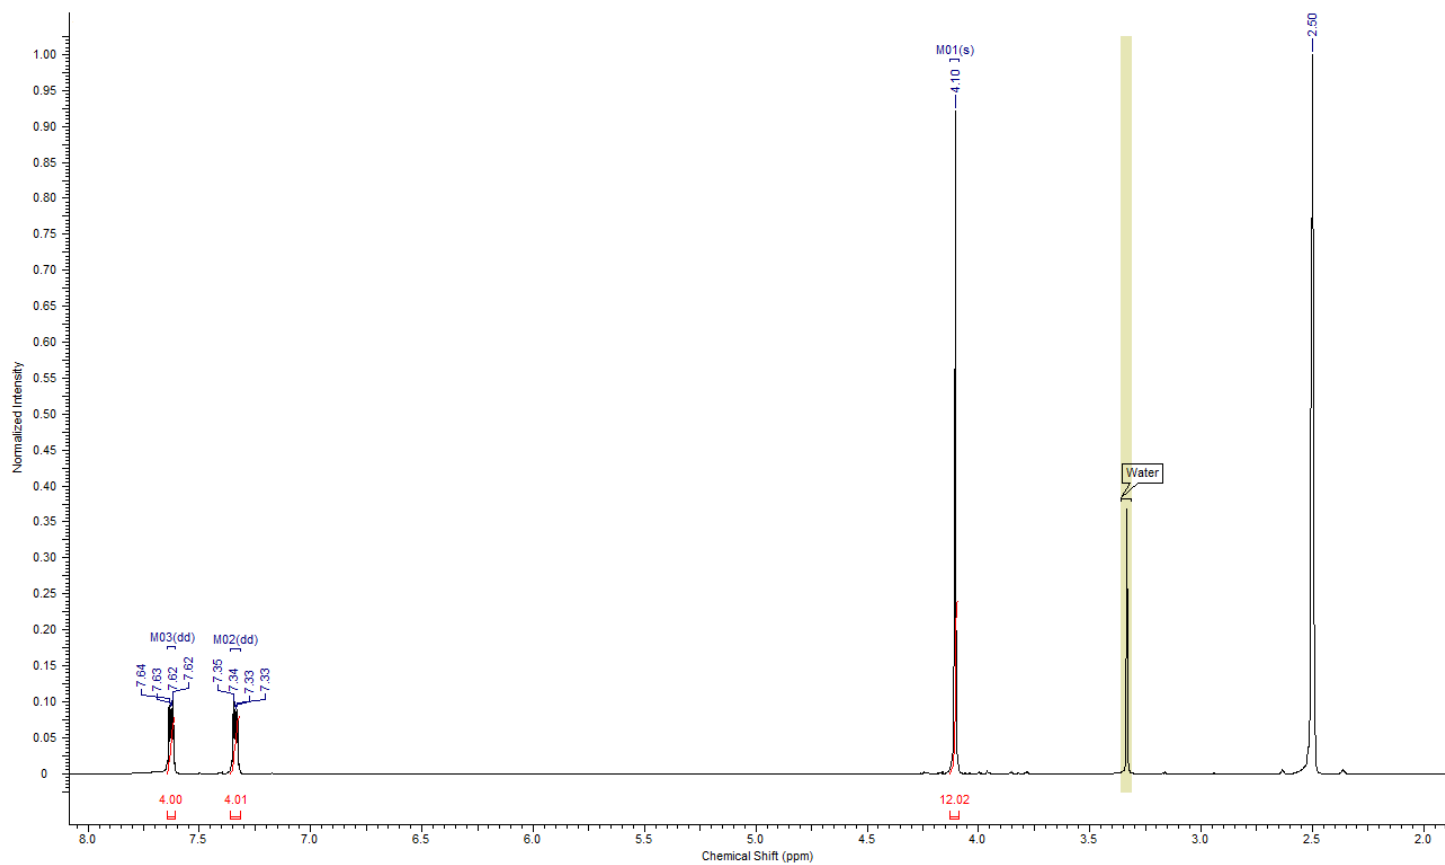

**Fig. S 1:**  $^1\text{H-NMR}$  spectrum (500 MHz,  $\text{DMSO-}d_6$ ) of complex **2a**.

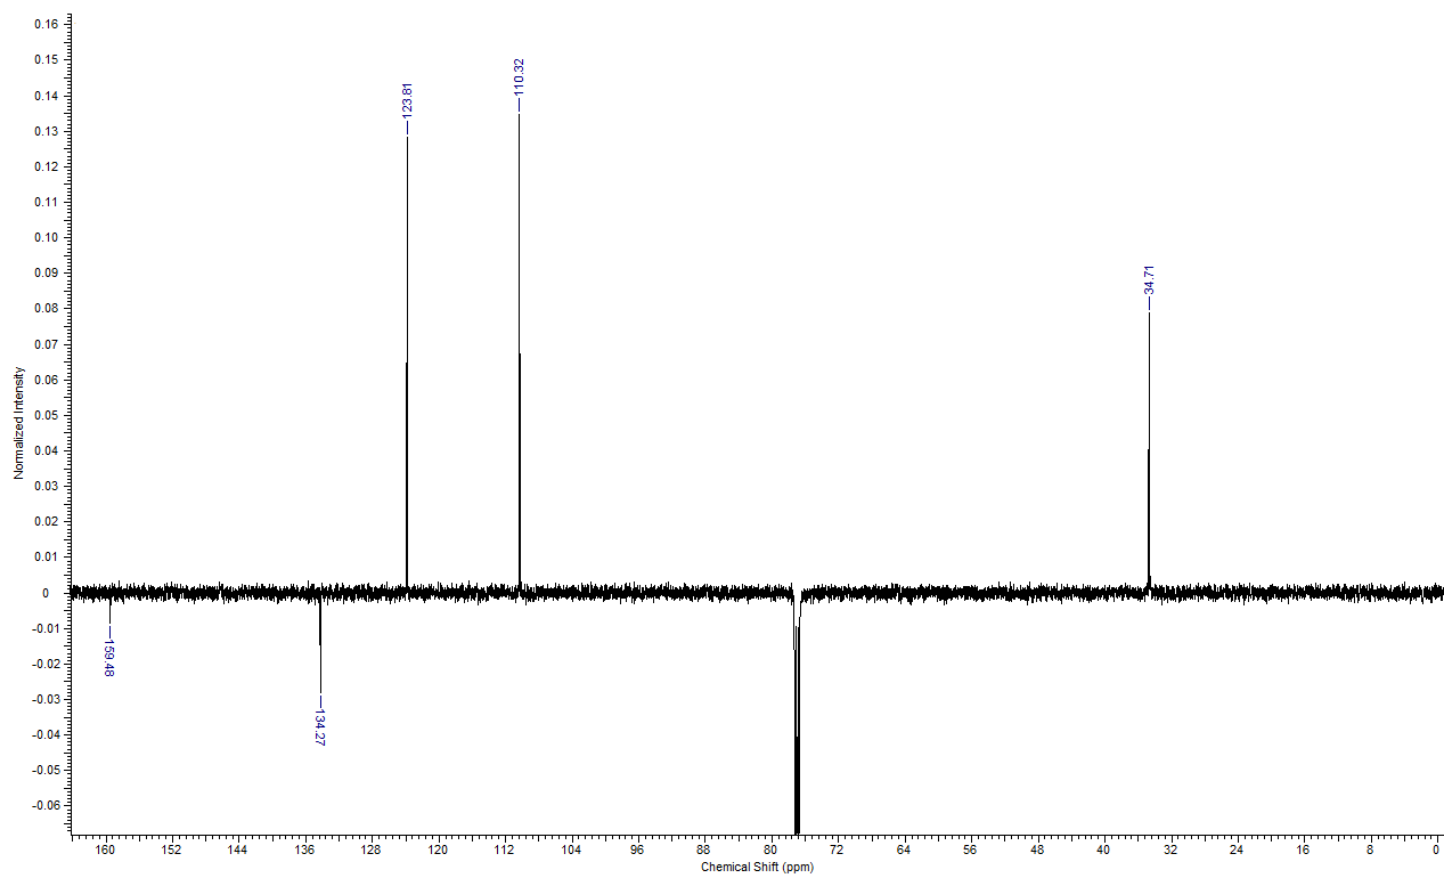

**Fig. S 2:**  $^{13}\text{C-NMR}$  spectrum (126 MHz,  $\text{CDCl}_3$ ) of complex **2a**.

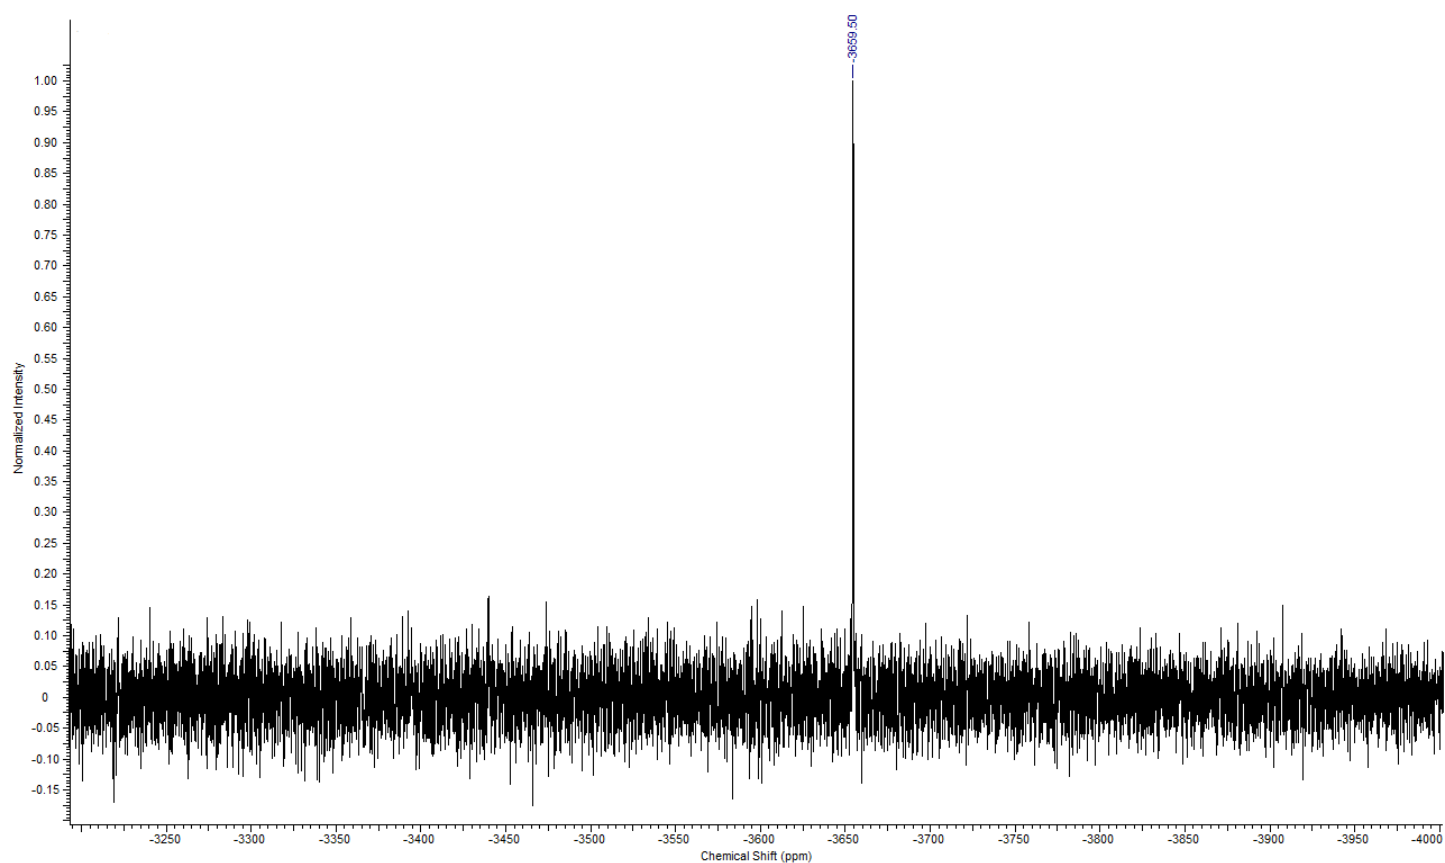

Fig. S 3:  $^{195}\text{Pt}$ -NMR spectrum (108 MHz,  $\text{CDCl}_3$ ) of complex **2a**.

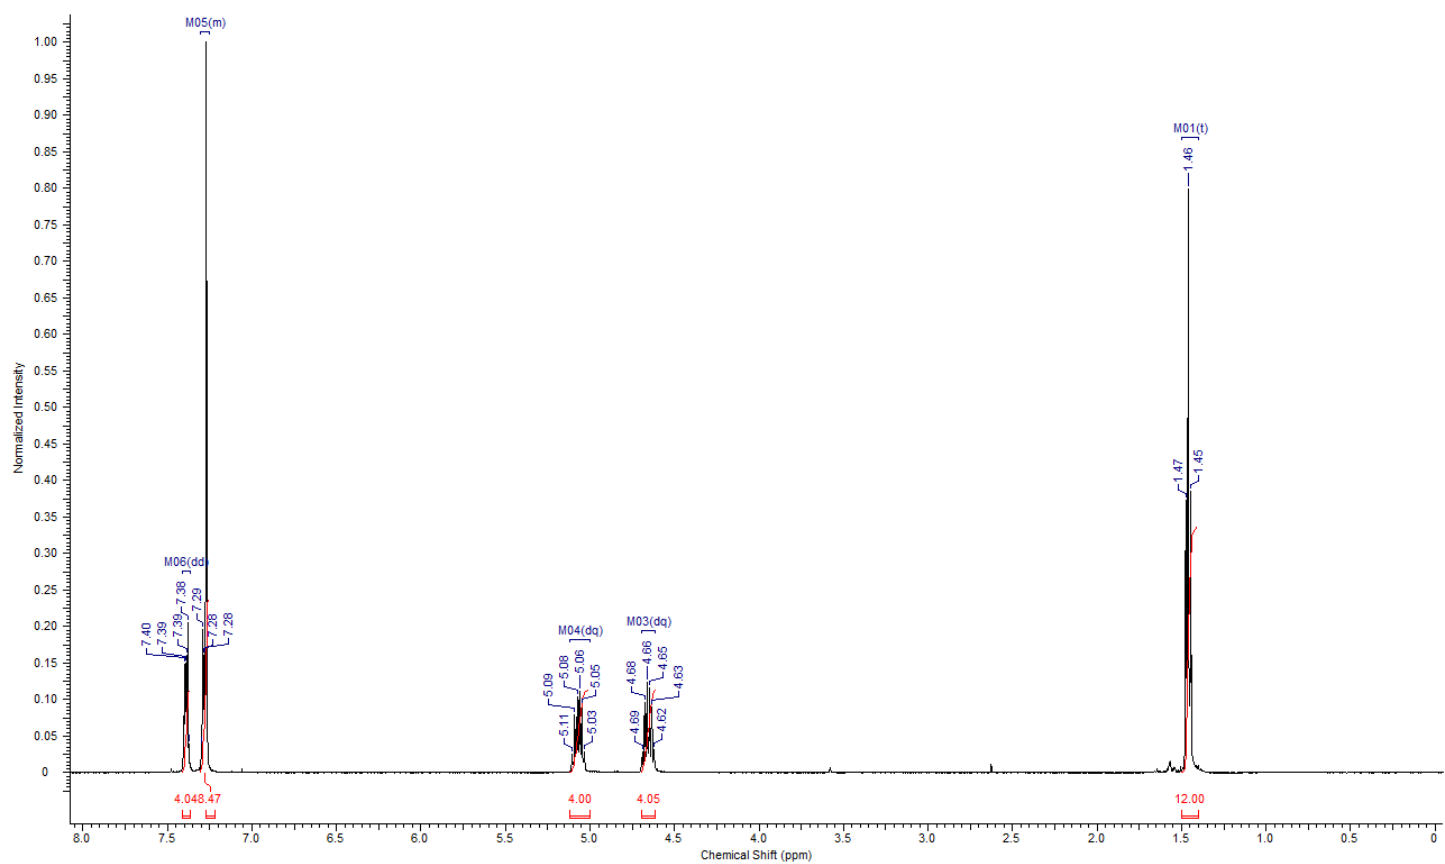

Fig. S 4:  $^1\text{H}$ -NMR spectrum (500 MHz,  $\text{CDCl}_3$ ) of complex **2b**.

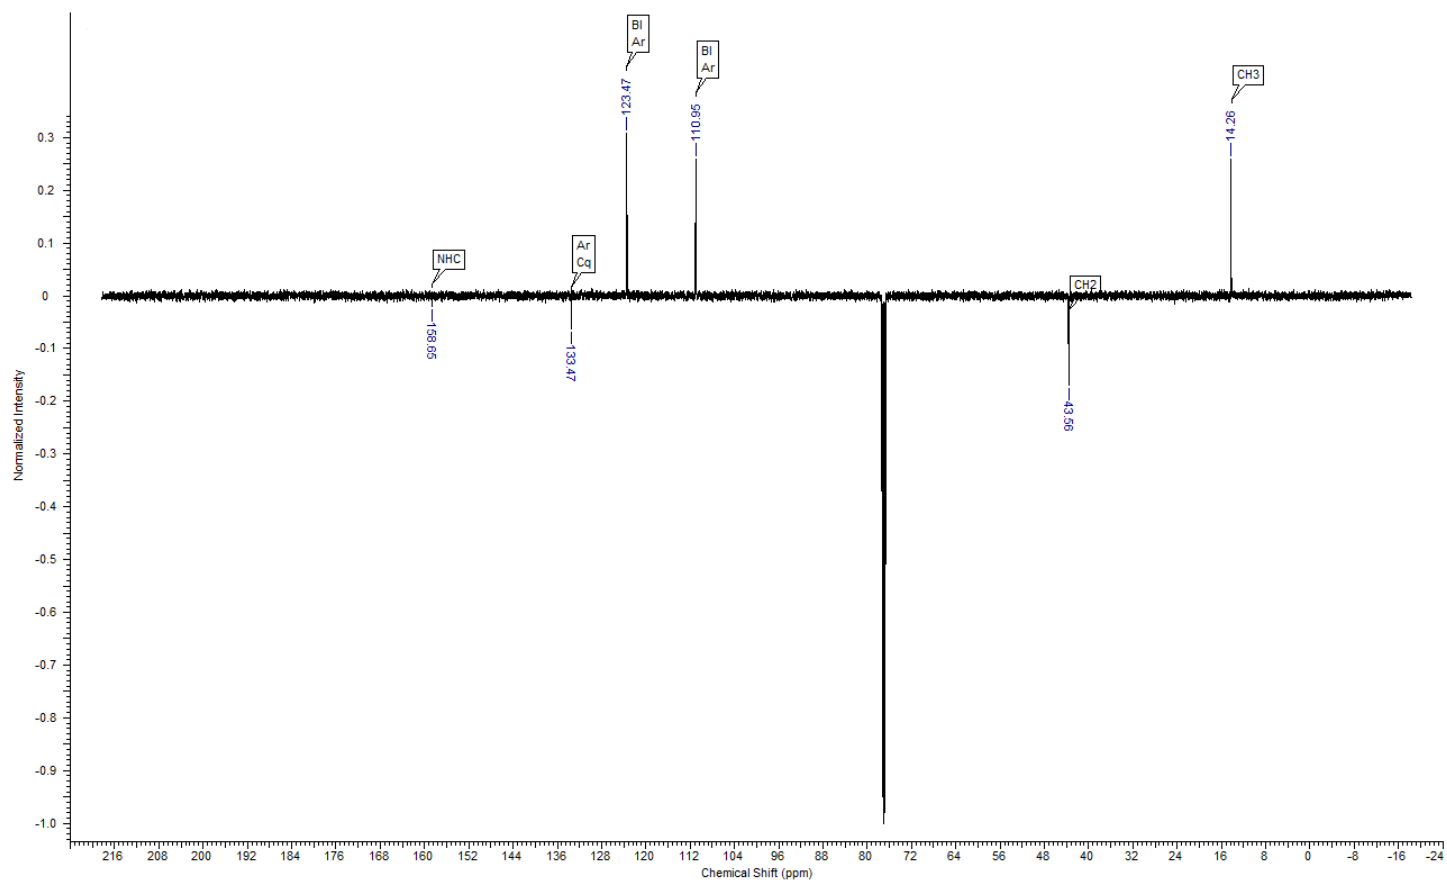

Fig. S 5:  $^{13}\text{C}$ -NMR spectrum (126 MHz,  $\text{CDCl}_3$ ) of complex **2b**.

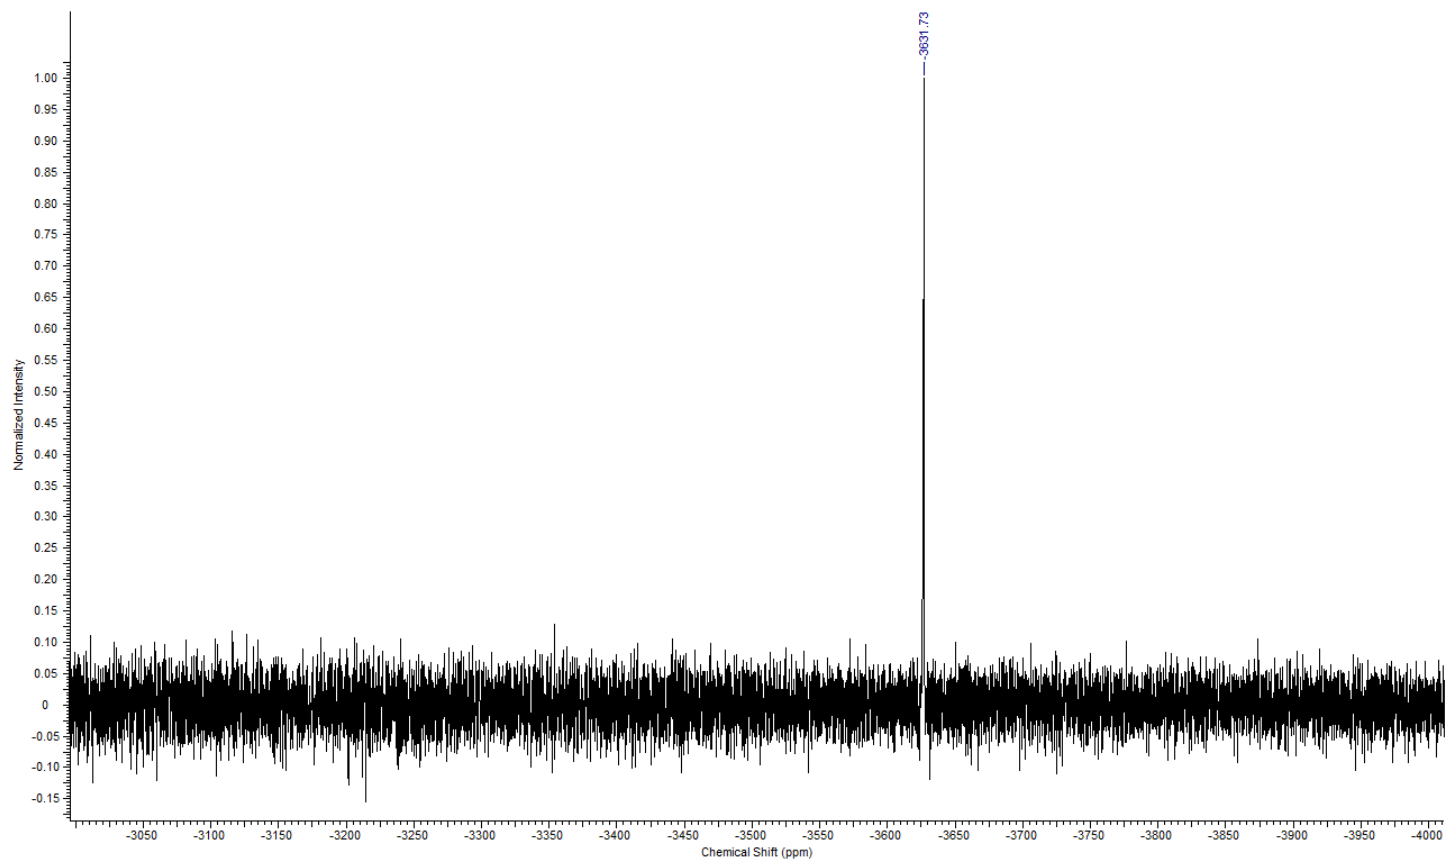

Fig. S 6:  $^{195}\text{Pt}$ -NMR spectrum (108 MHz,  $\text{CDCl}_3$ ) of complex **2b**.

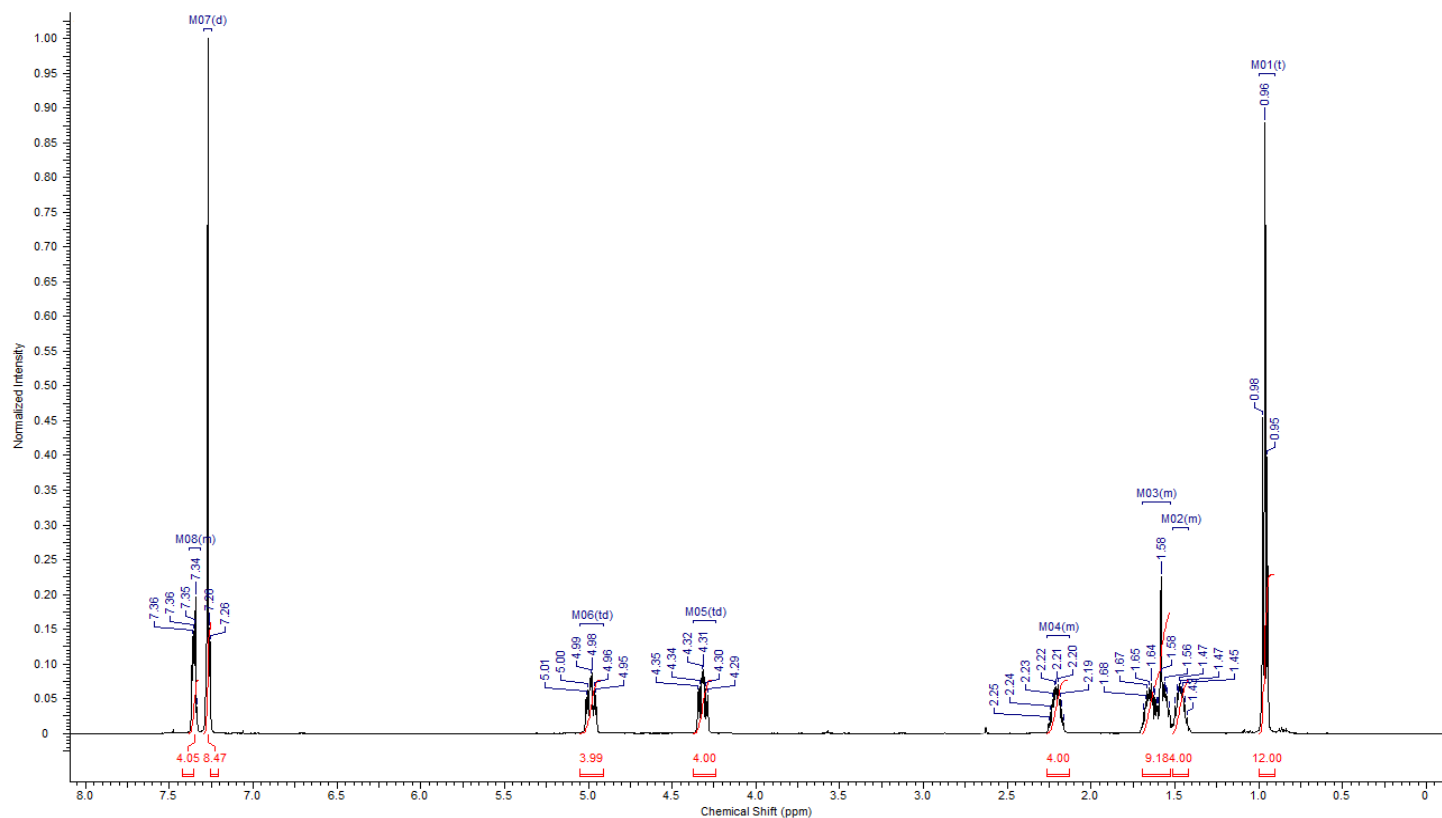

**Fig. S 7:**  $^1\text{H-NMR}$  spectrum (500 MHz,  $\text{CDCl}_3$ ) of complex **2c**.

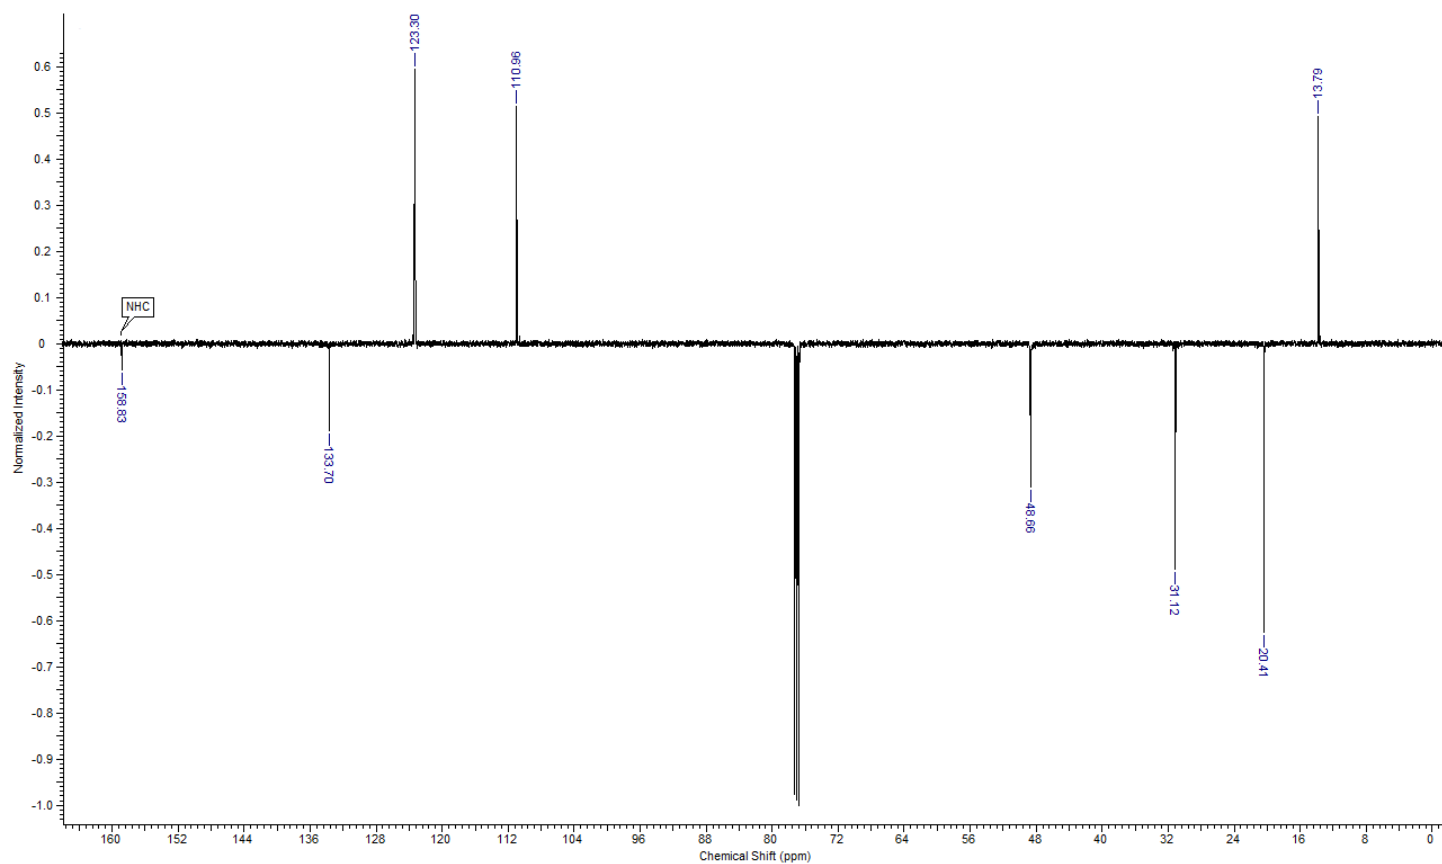

**Fig. S 8:**  $^{13}\text{C-NMR}$  spectrum (126 MHz,  $\text{CDCl}_3$ ) of complex **2c**.

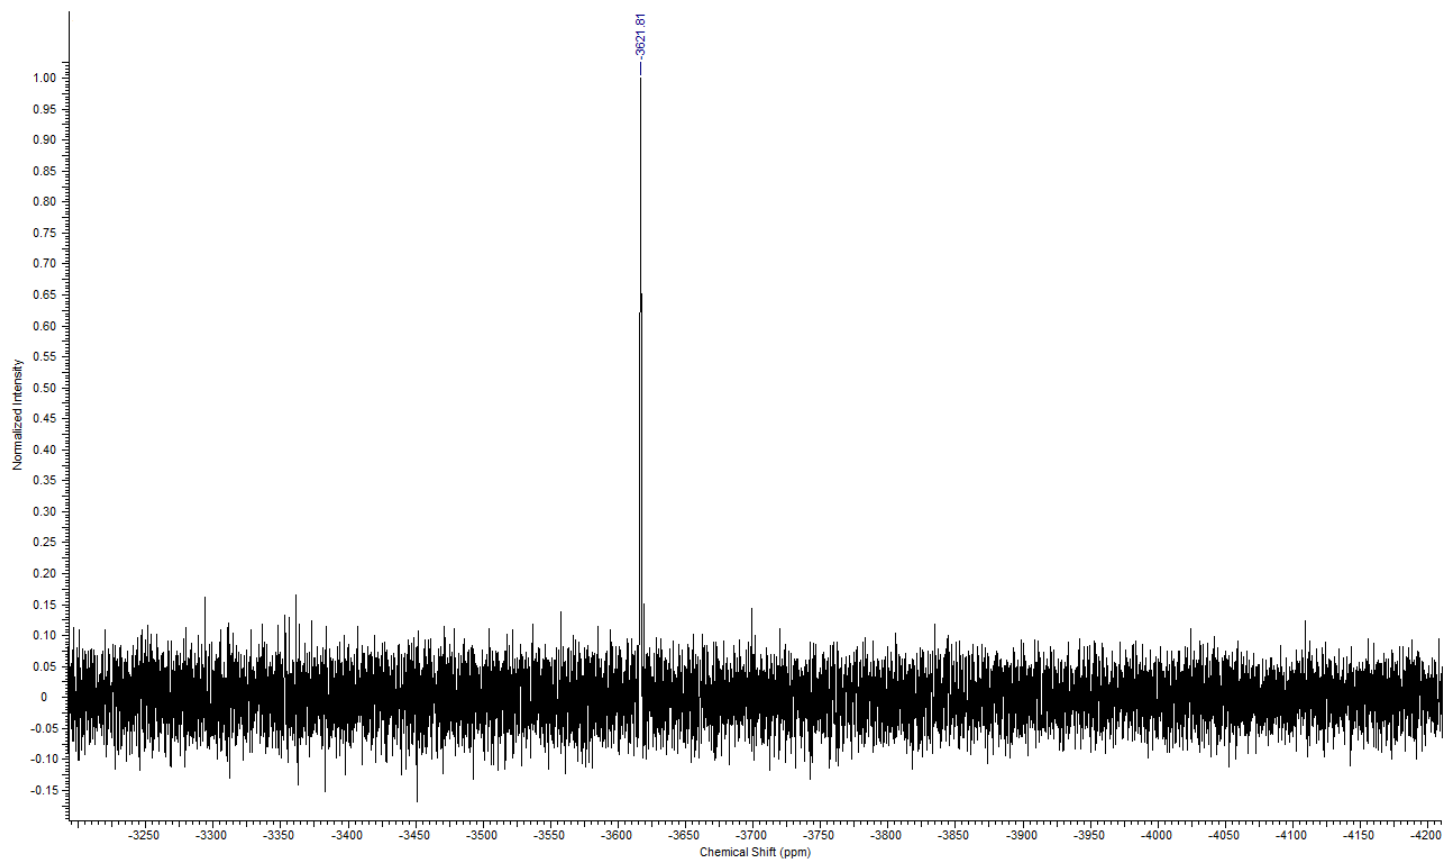

Fig. S 9:  $^{195}\text{Pt}$ -NMR spectrum (108 MHz,  $\text{CDCl}_3$ ) of complex **2c**.

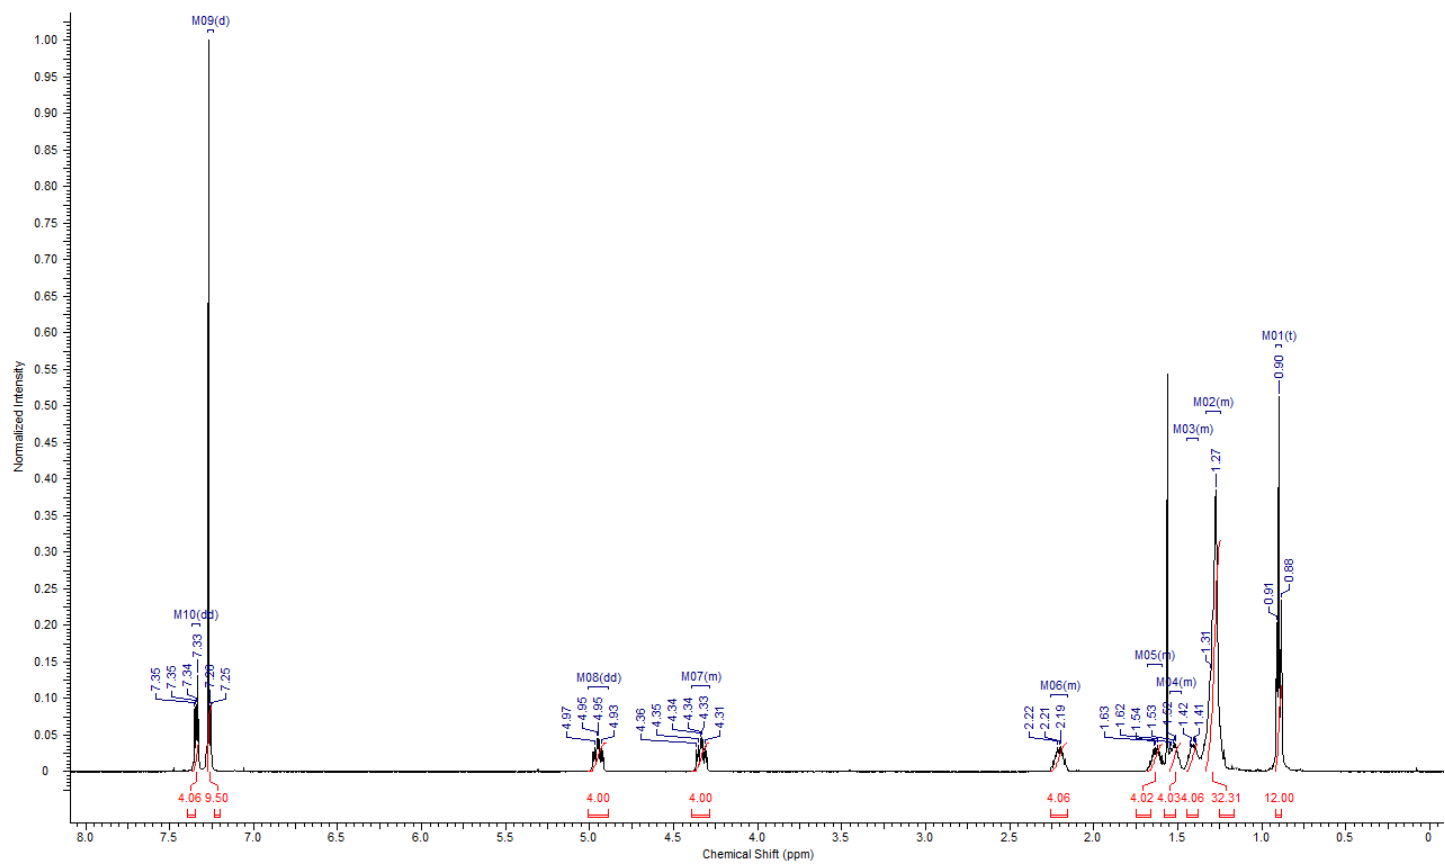

Fig. S 10:  $^1\text{H}$ -NMR spectrum (500 MHz,  $\text{CDCl}_3$ ) of complex **2d**.

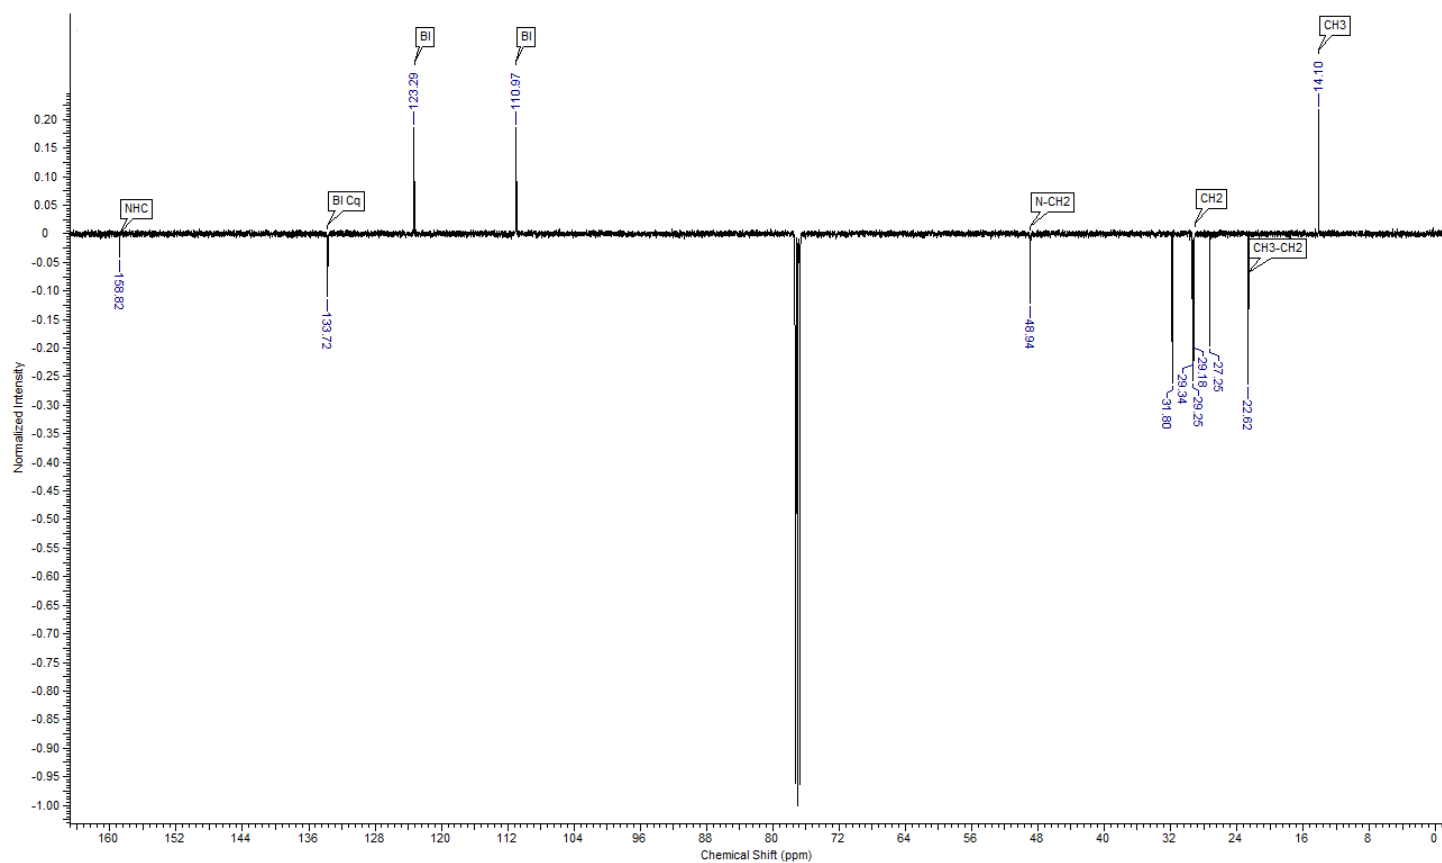

Fig. S 11:  $^{13}\text{C}$ -NMR spectrum (126 MHz,  $\text{CDCl}_3$ ) of complex **2d**.

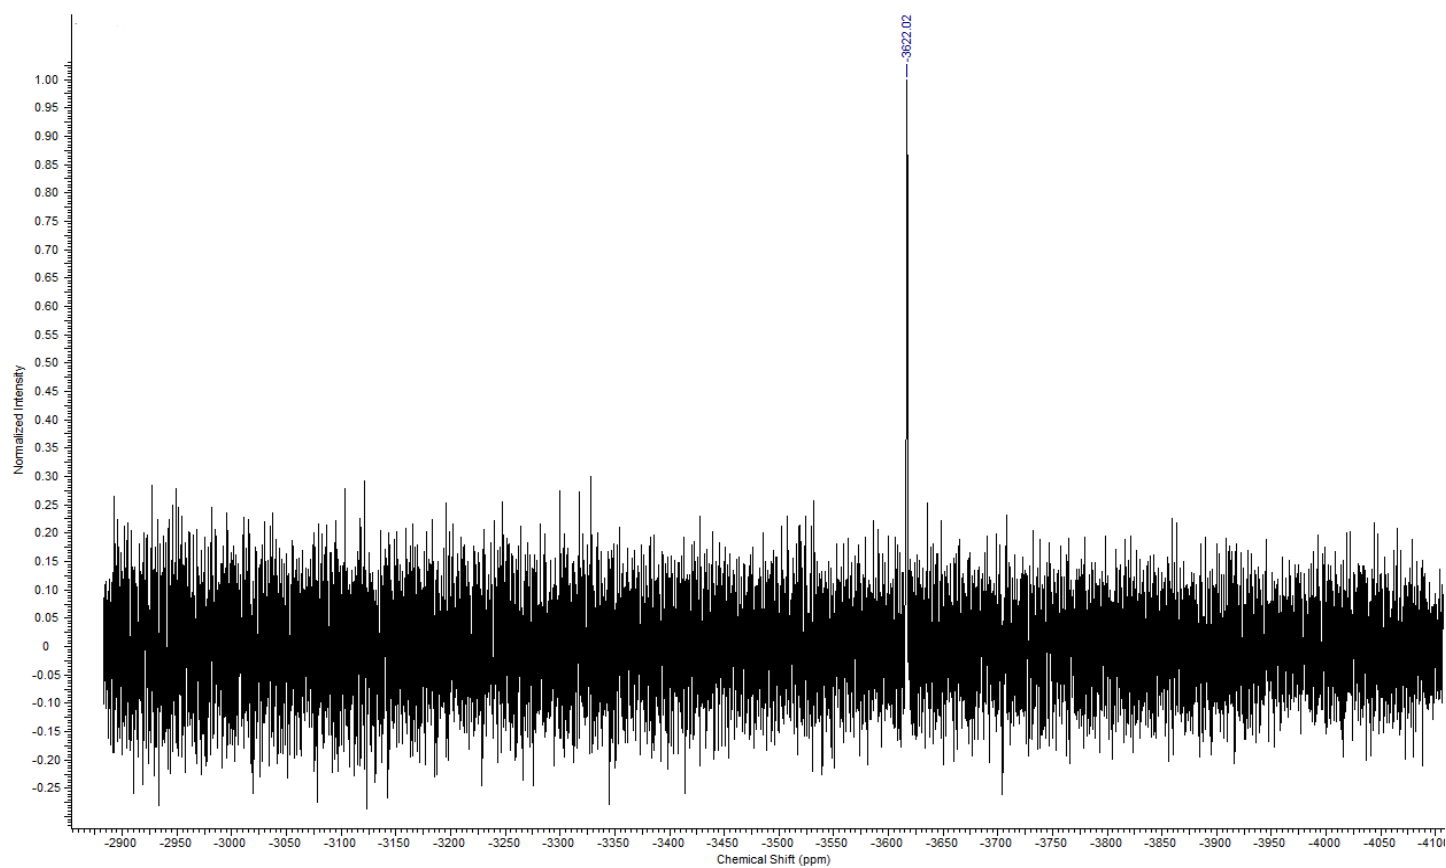

Fig. S 12:  $^{195}\text{Pt}$ -NMR spectrum (108 MHz,  $\text{CDCl}_3$ ) of complex **2d**.



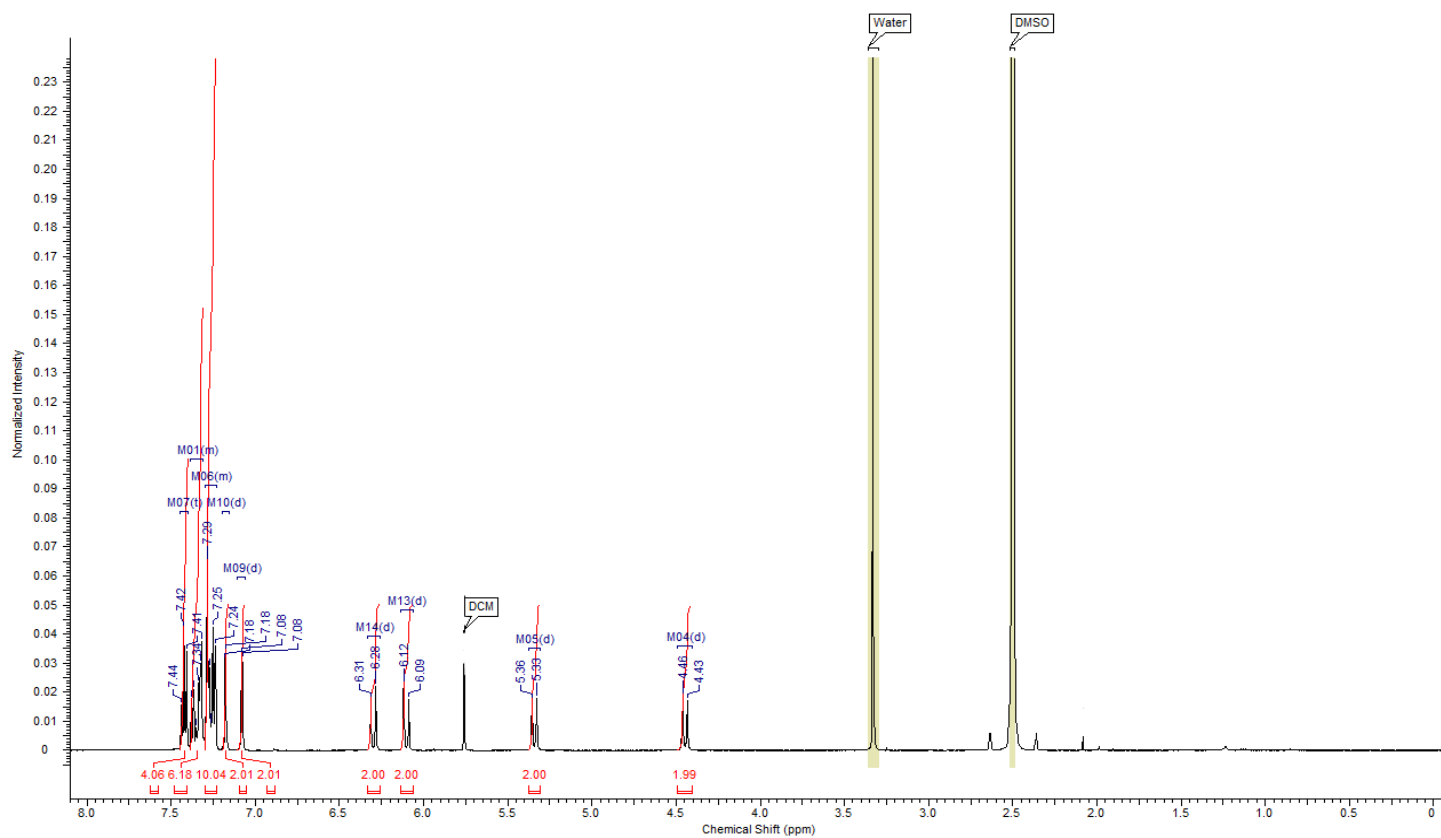

Fig. S 13:  $^1\text{H-NMR}$  spectrum (500 MHz,  $\text{DMSO-}d_6$ ) of complex 3.

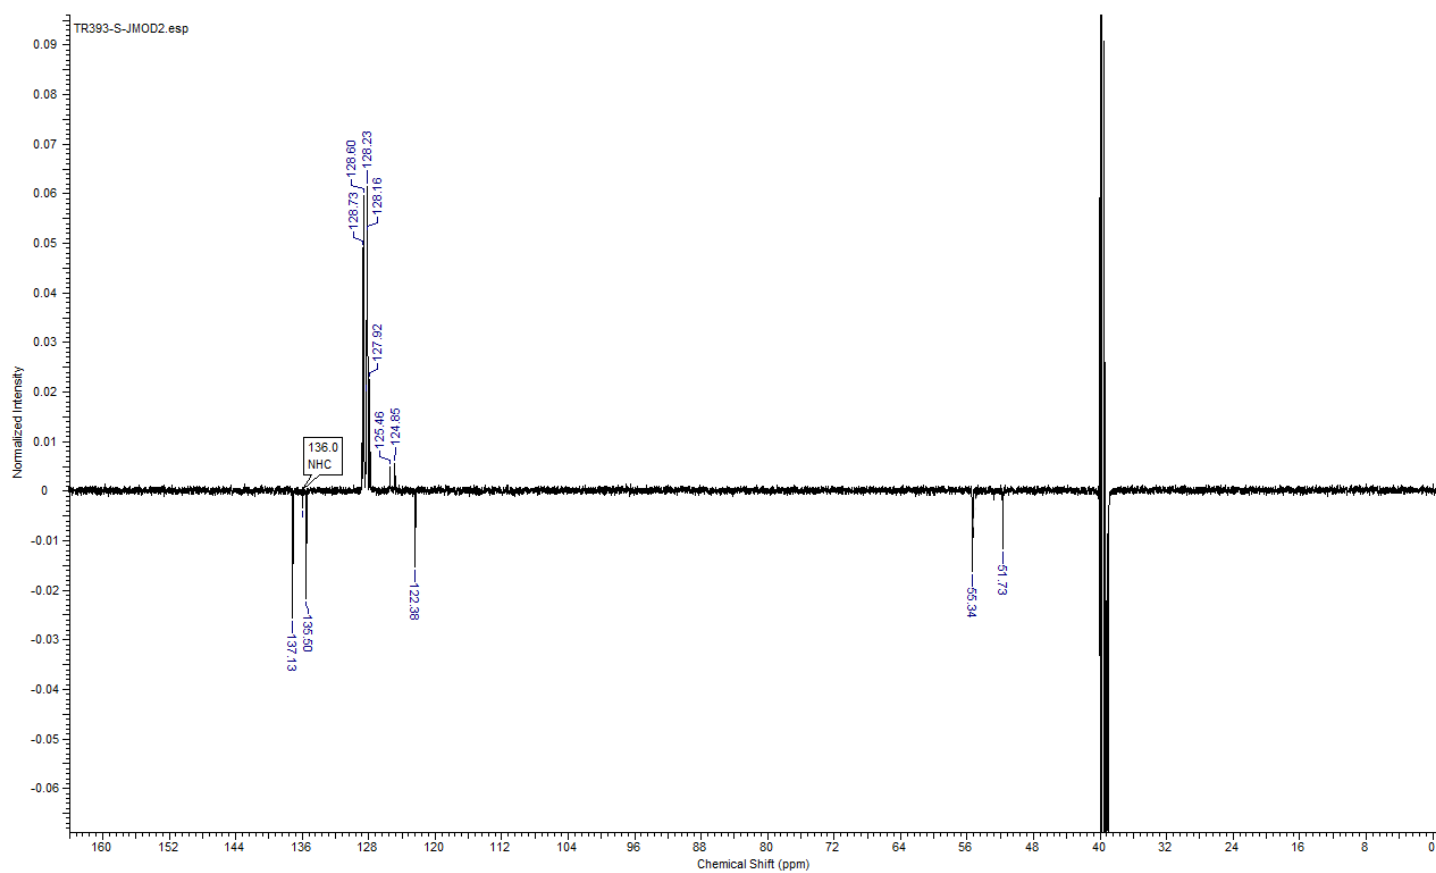

Fig. S 14:  $^{13}\text{C-NMR}$  spectrum (126 MHz,  $\text{DMSO-}d_6$ ) of complex 3.

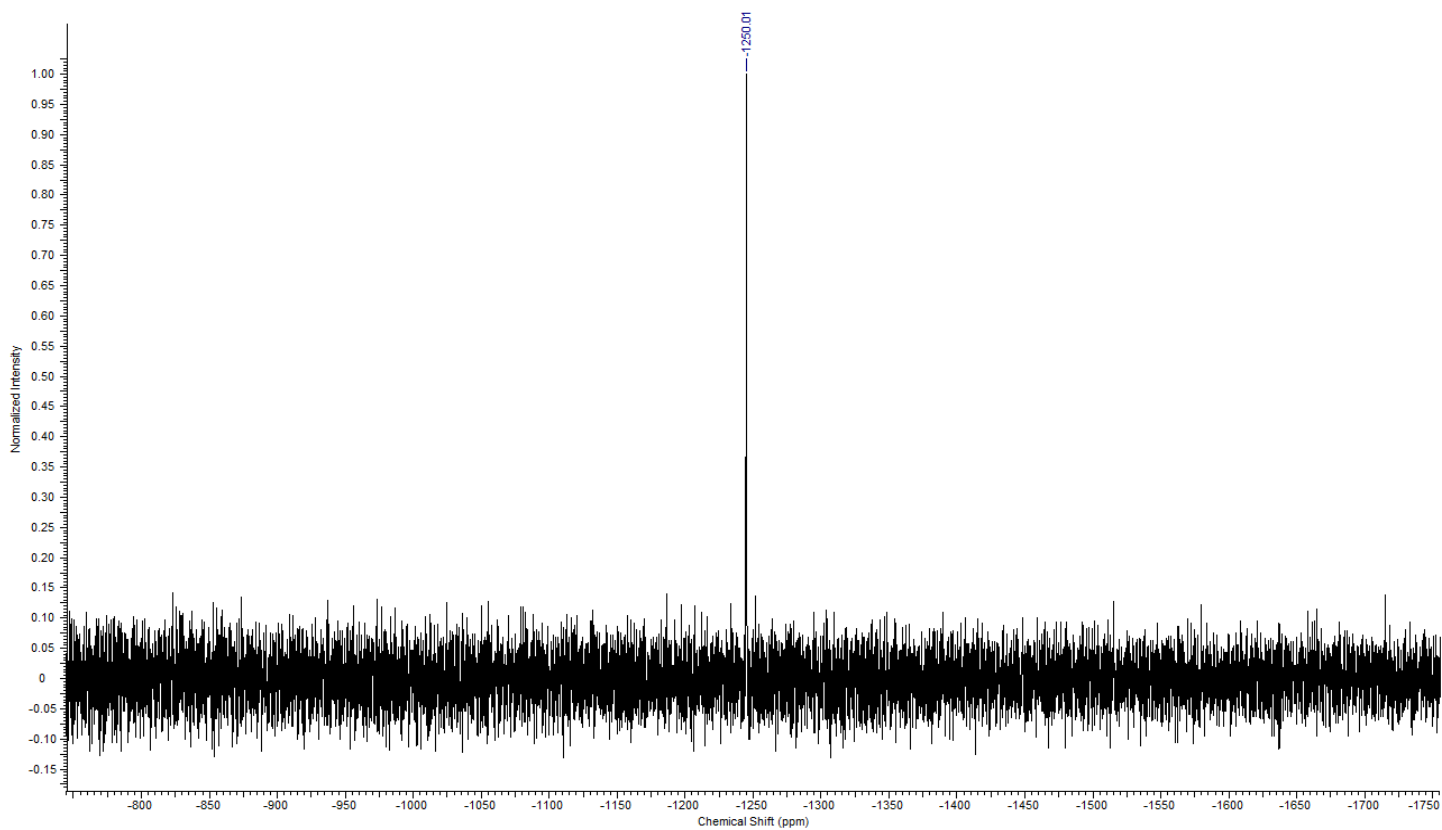

Fig. S 15:  $^{195}\text{Pt}$ -NMR spectrum (108 MHz,  $\text{DMSO-}d_6$ ) of complex **3**.

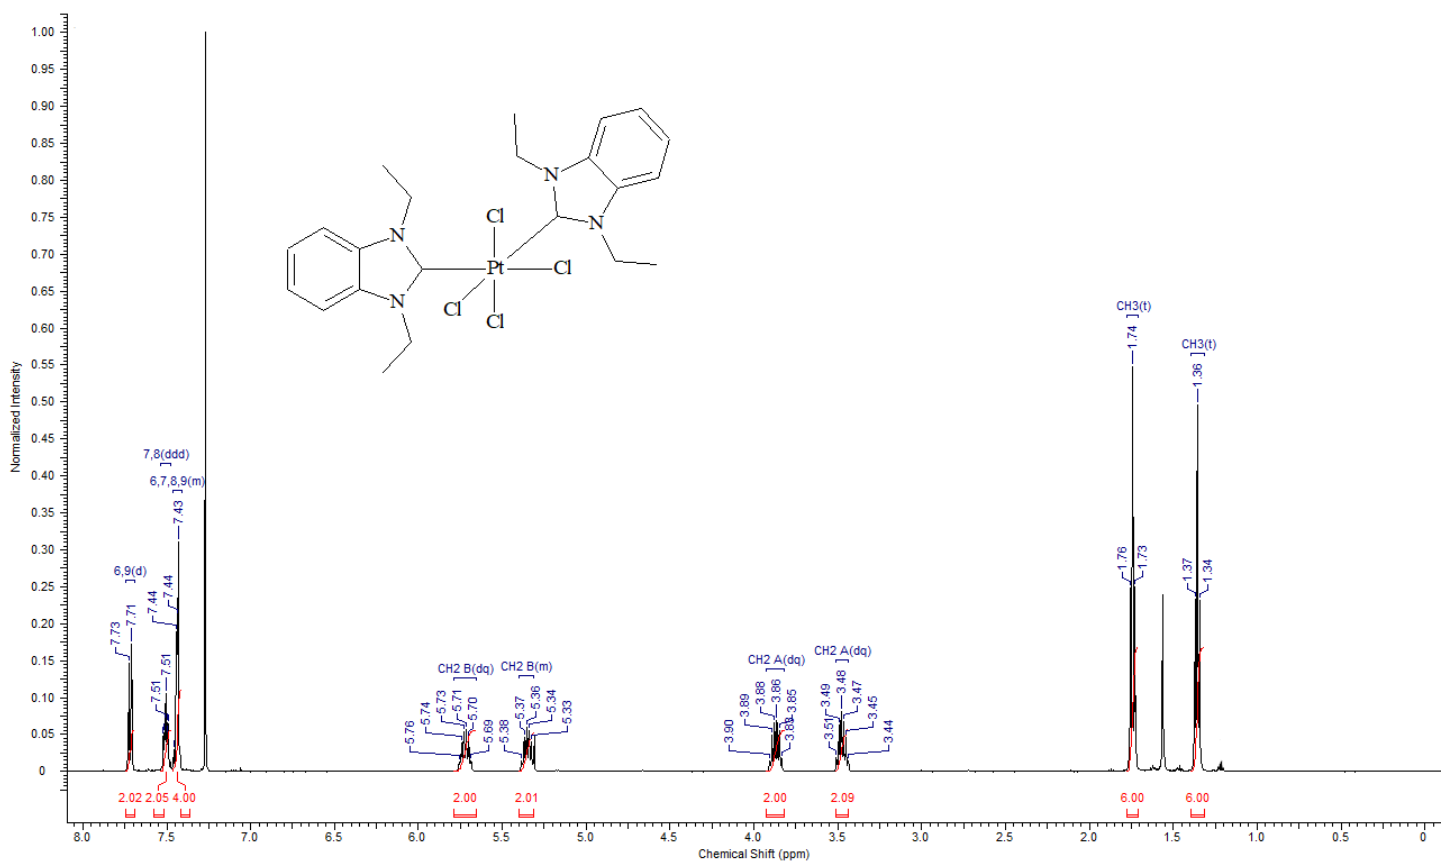

Fig. S 16:  $^1\text{H}$ -NMR spectrum (500 MHz,  $\text{CDCl}_3$ ) of complex **4b**.

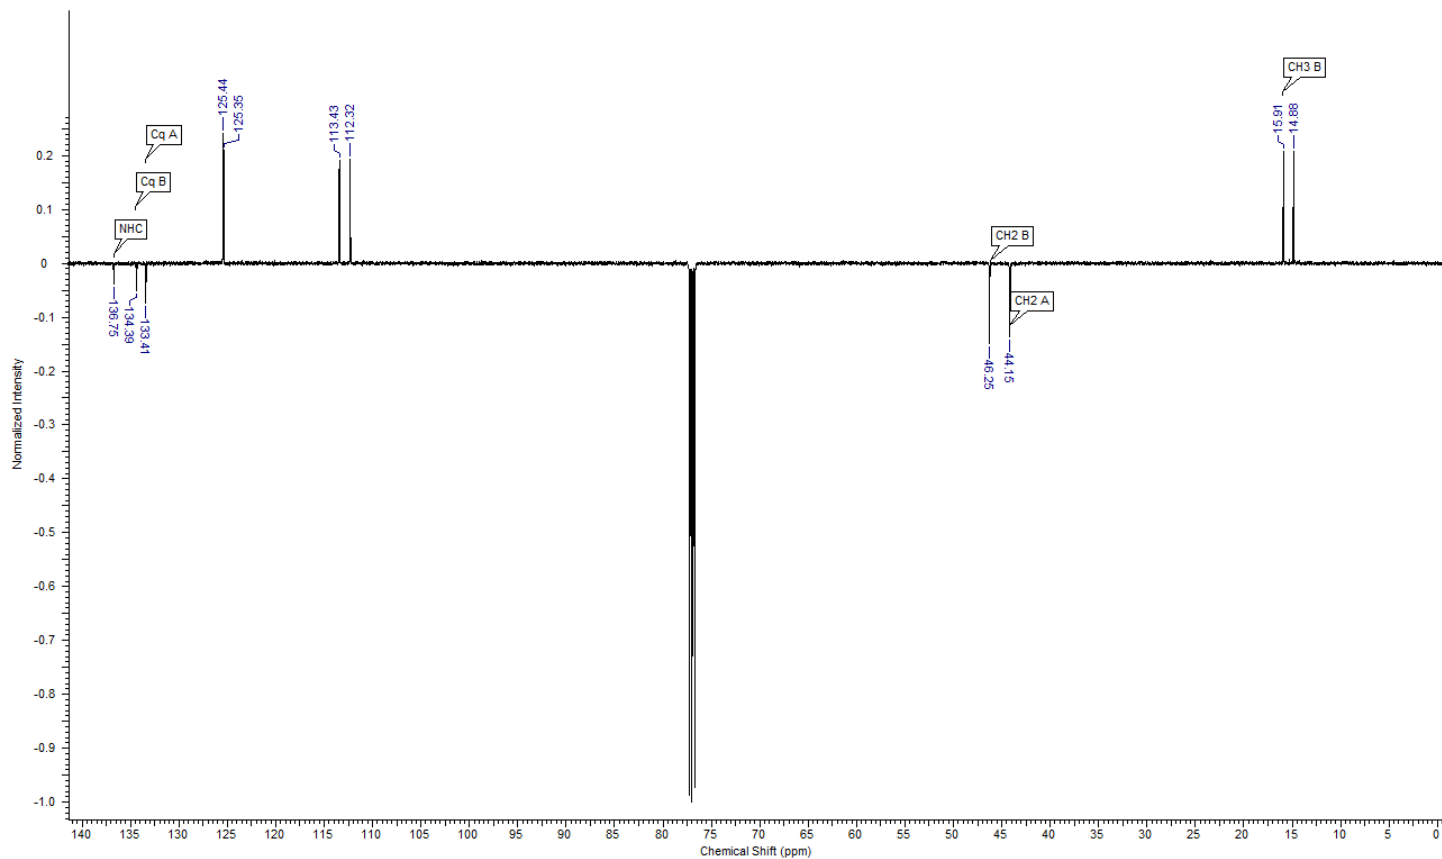

Fig. S 17:  $^{13}\text{C}$ -NMR spectrum (126 MHz,  $\text{CDCl}_3$ ) of complex **4b**.

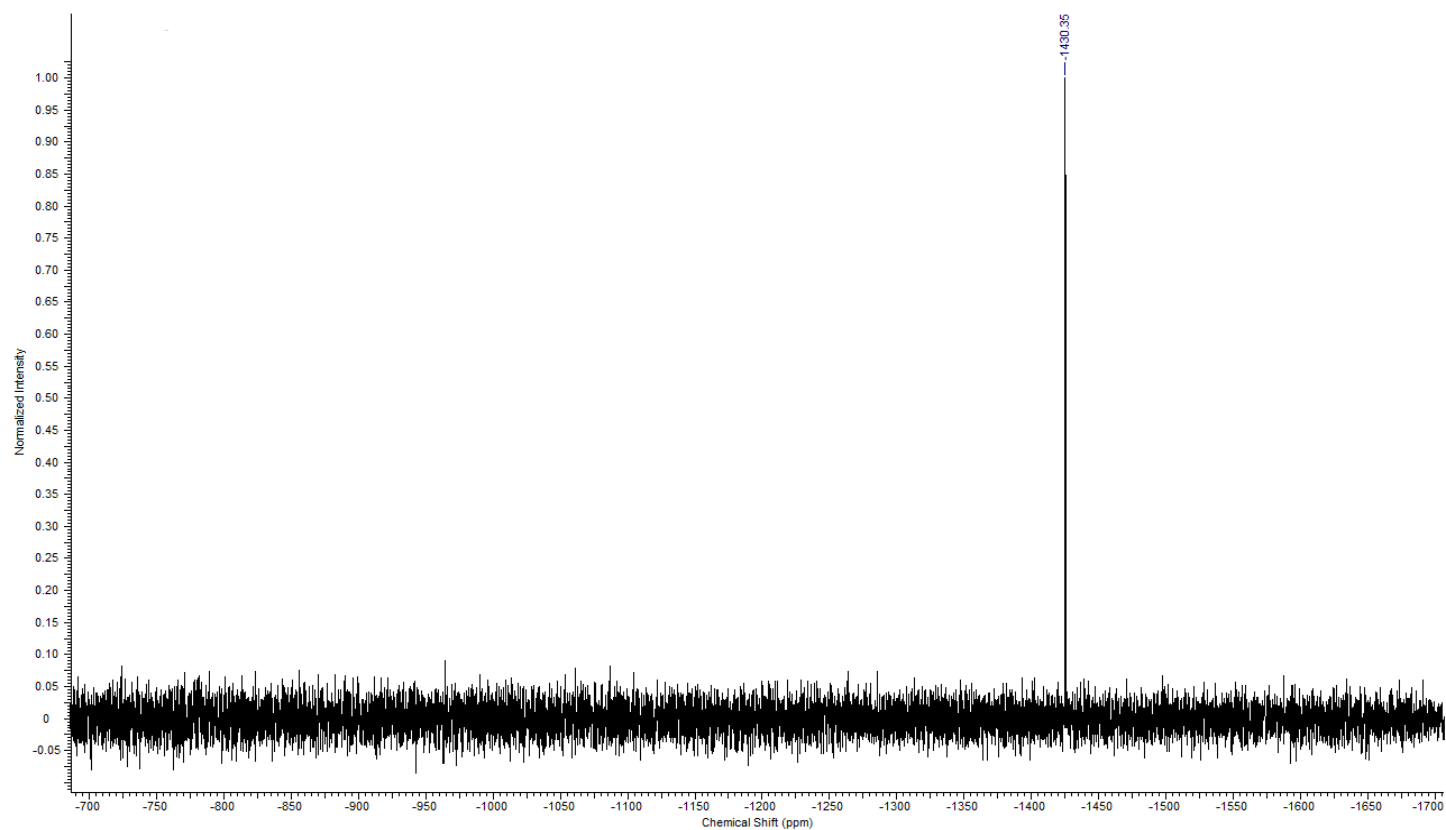

Fig. S 18:  $^{195}\text{Pt}$ -NMR spectrum (108 MHz,  $\text{CDCl}_3$ ) of complex **4b**.

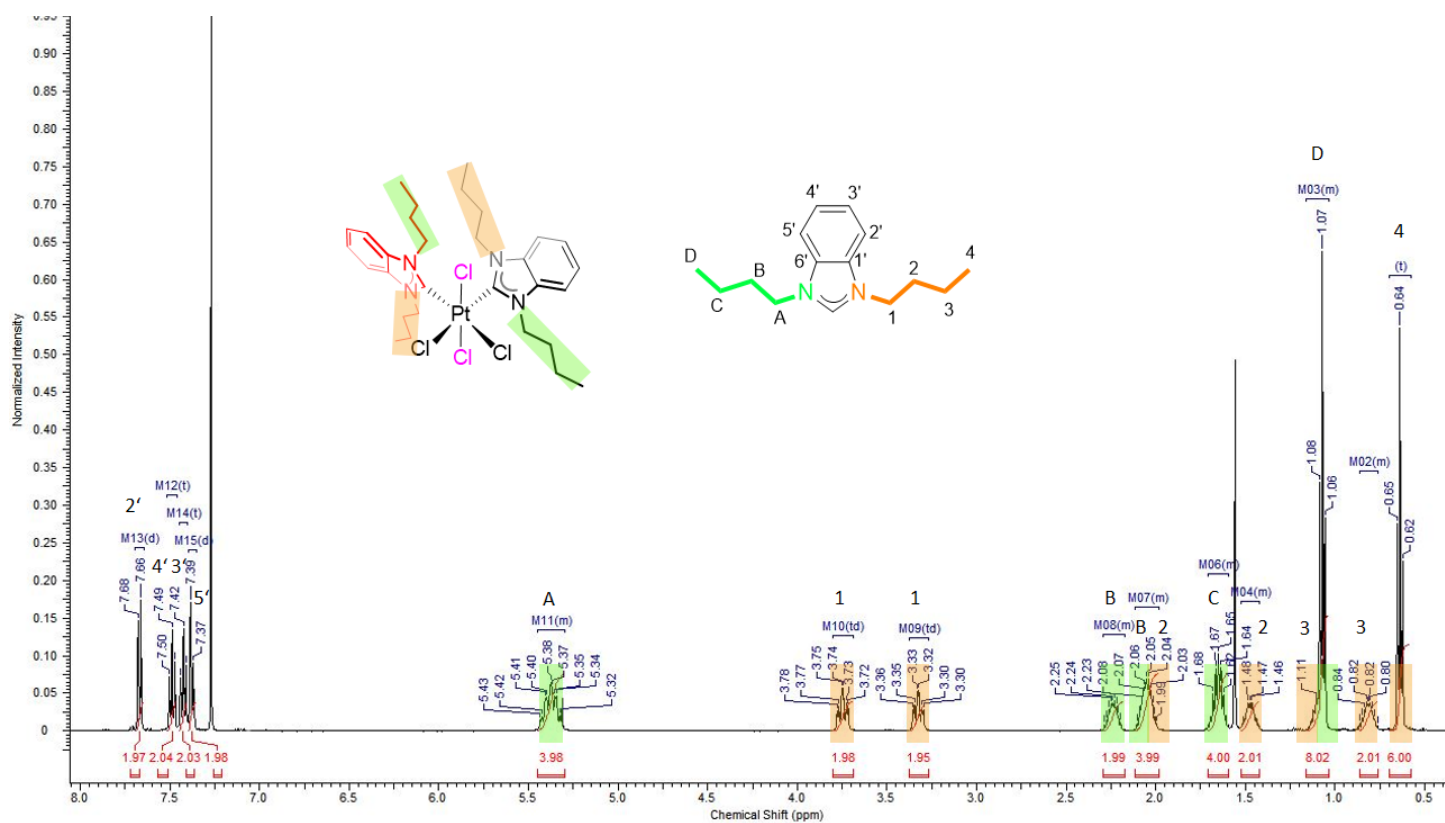

Fig. S 19:  $^1\text{H-NMR}$  spectrum (500 MHz,  $\text{CDCl}_3$ ) of complex **4c**.

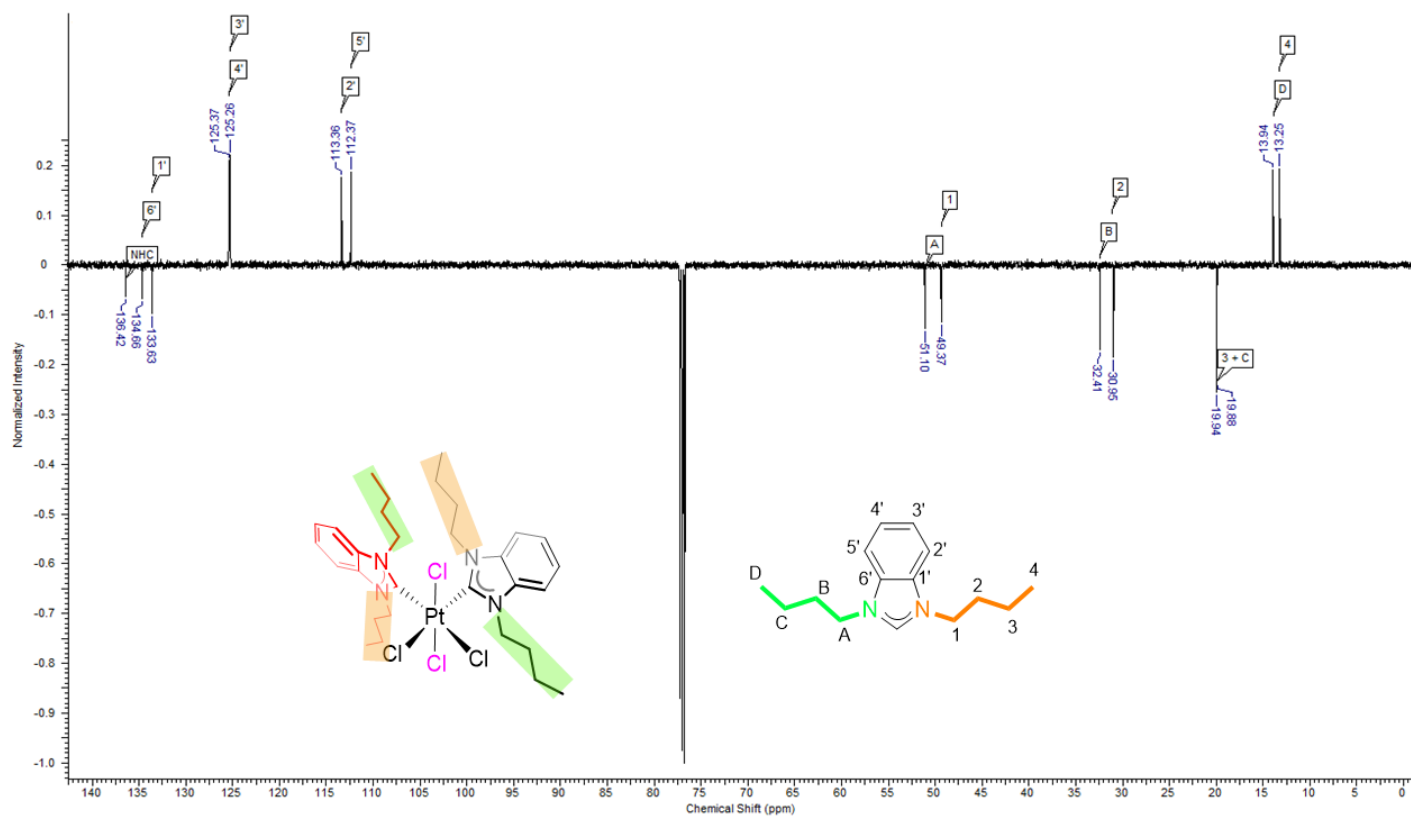

Fig. S 20:  $^{13}\text{C-NMR}$  spectrum (126 MHz,  $\text{CDCl}_3$ ) of complex **4c**.

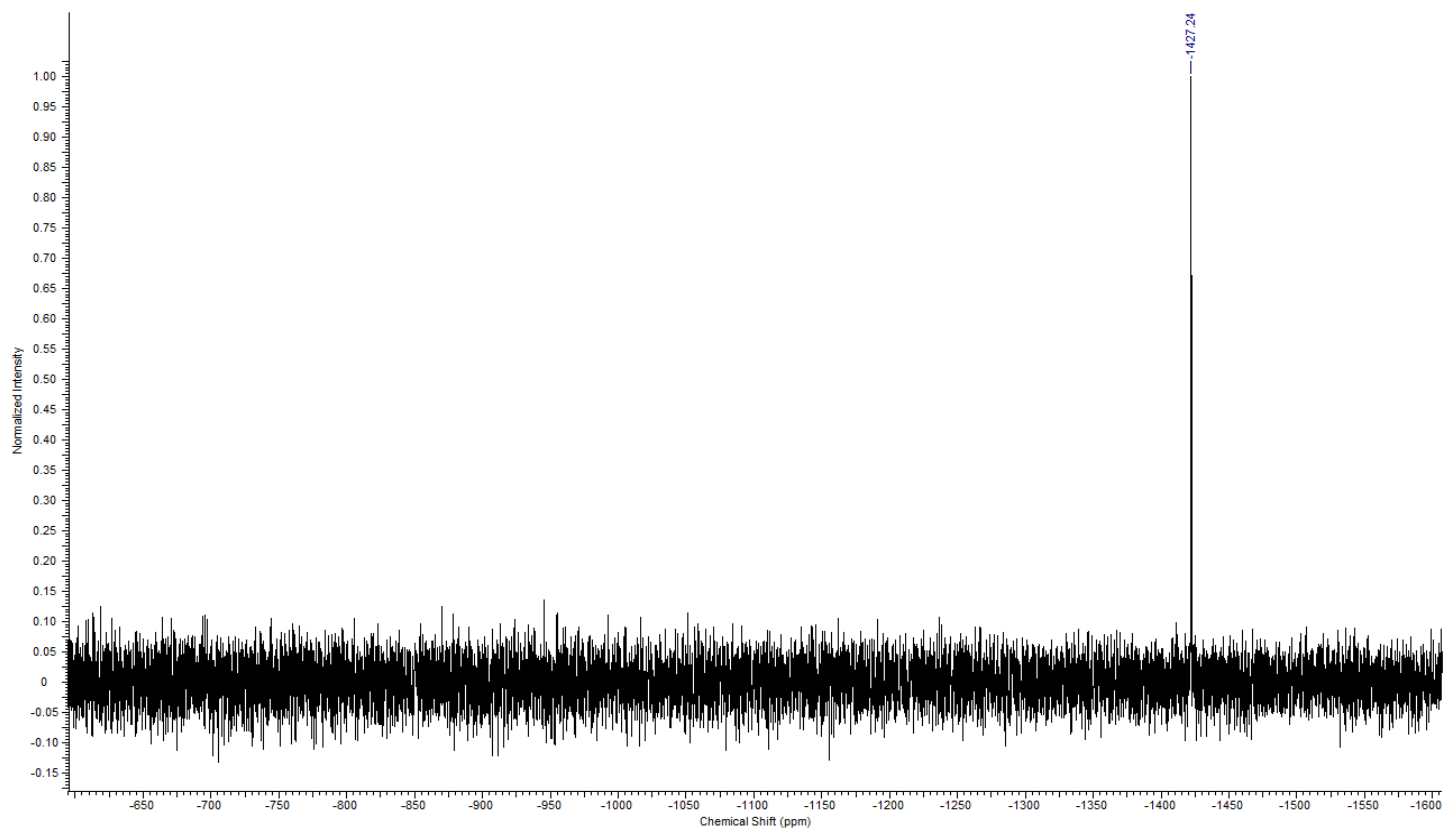

Fig. S 21:  $^{195}\text{Pt}$ -NMR spectrum (108 MHz,  $\text{CDCl}_3$ ) of complex **4c**.

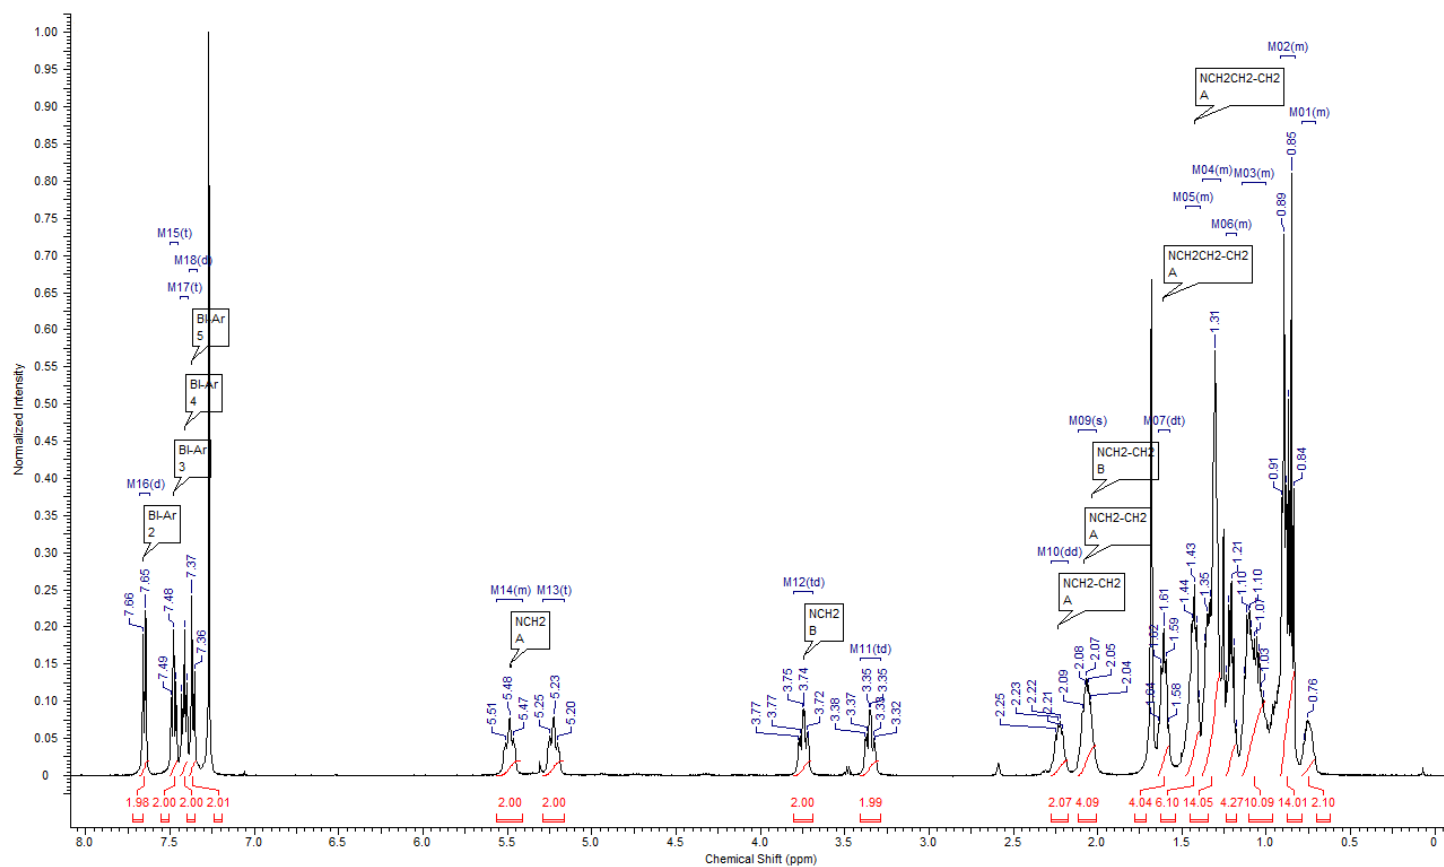

Fig. S 22:  $^1\text{H}$ -NMR spectrum (500 MHz,  $\text{CDCl}_3$ ) of complex **4d**.

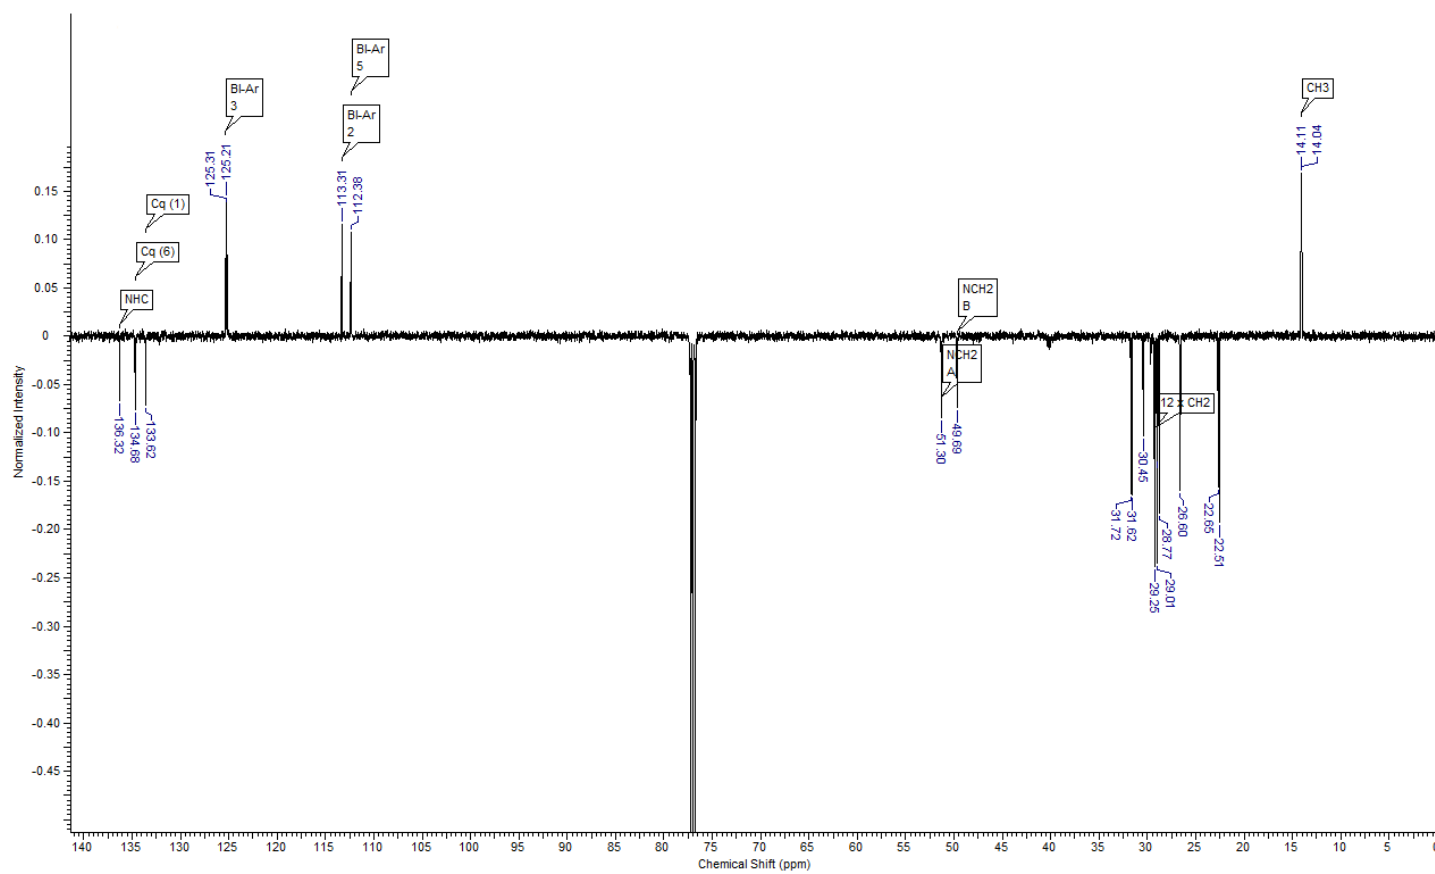

Fig. S 23:  $^{13}\text{C}$ -NMR spectrum (126 MHz,  $\text{CDCl}_3$ ) of complex **4d**.

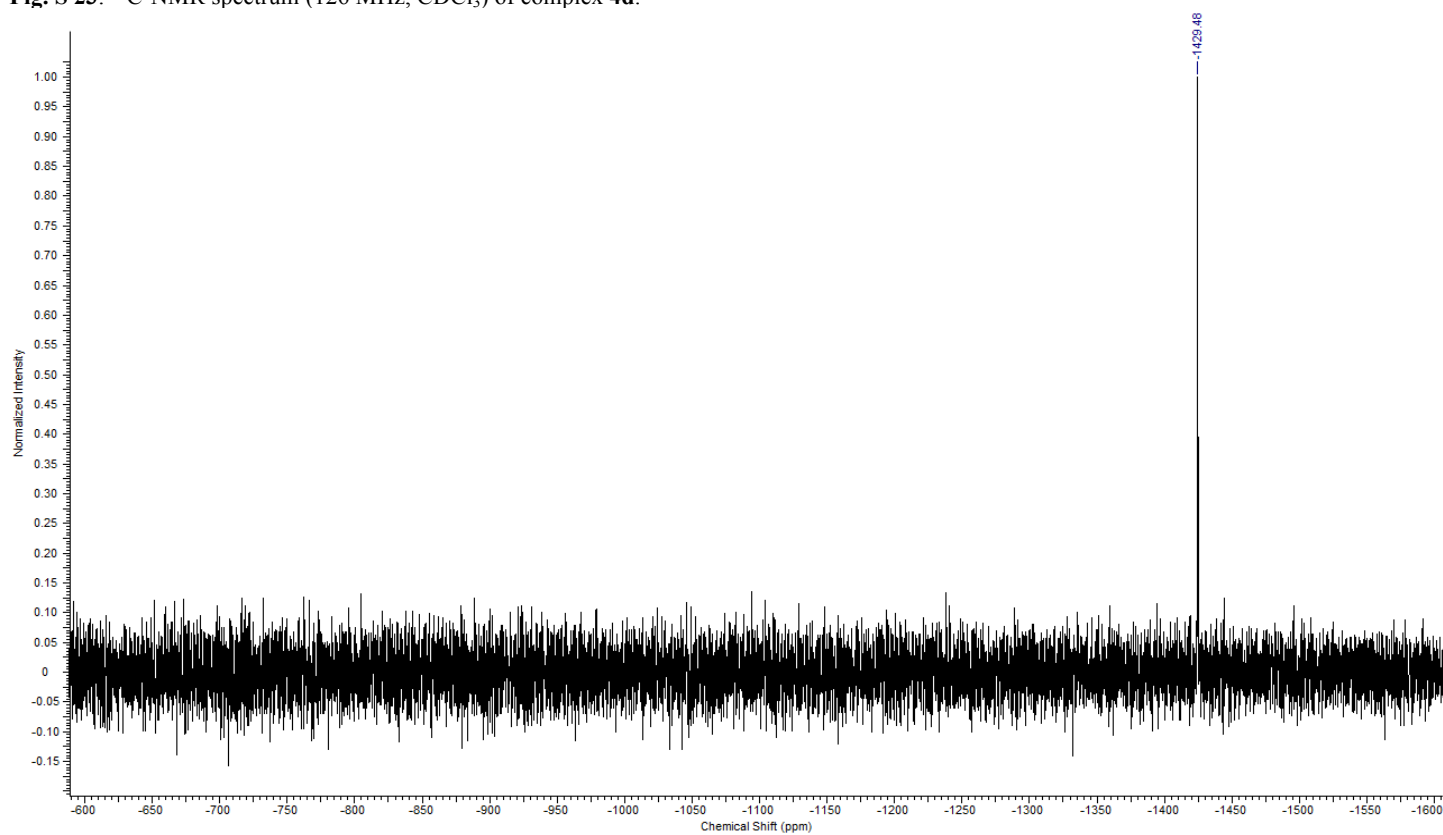

Fig. S 24:  $^{195}\text{Pt}$ -NMR spectrum (108 MHz,  $\text{CDCl}_3$ ) of complex **4d**.

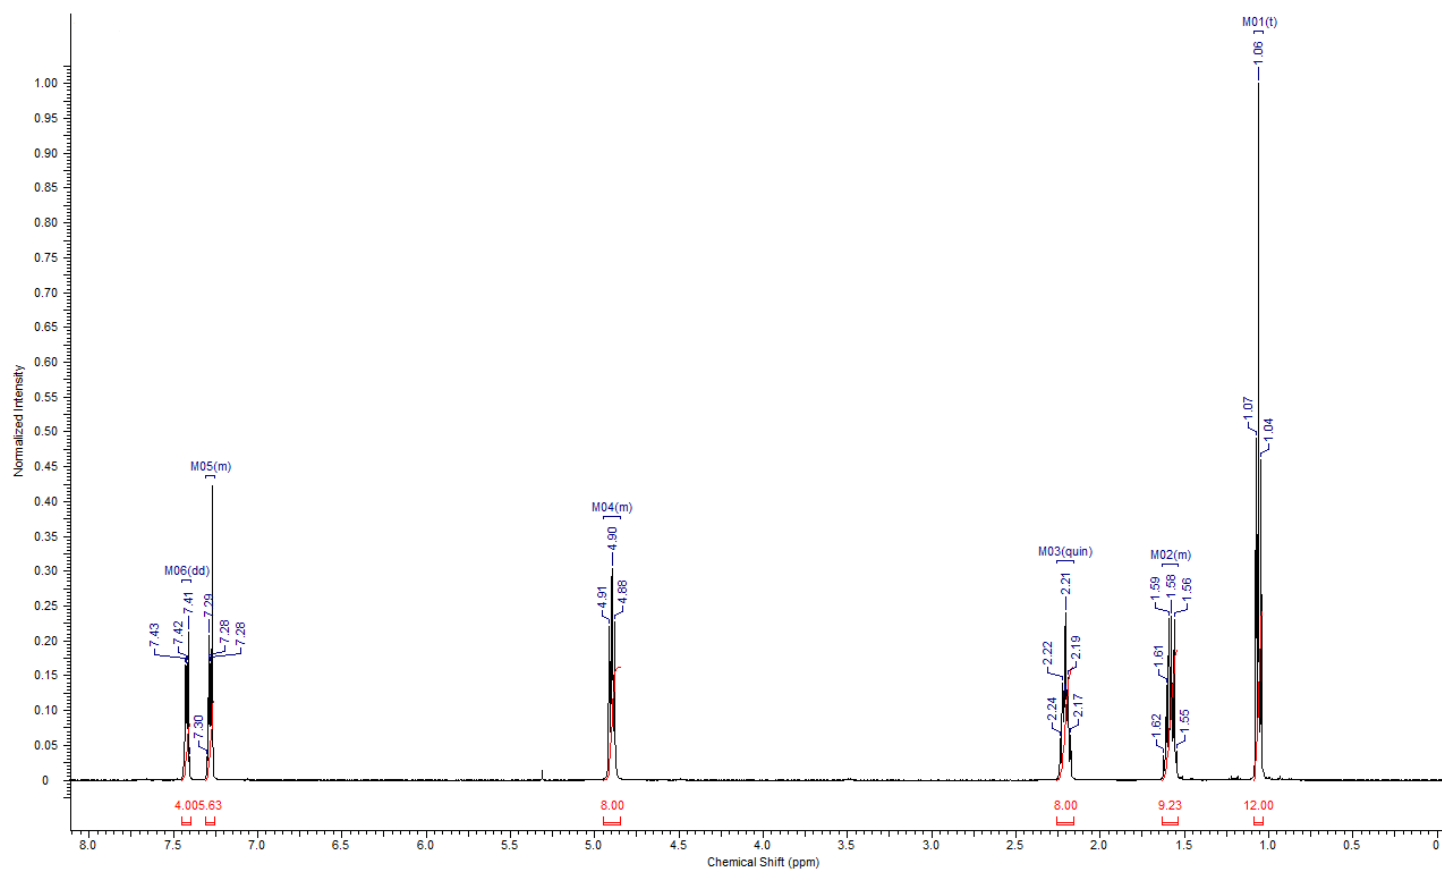

Fig. S 25:  $^1\text{H-NMR}$  spectrum (500 MHz,  $\text{CDCl}_3$ ) of complex *trans-2c*.

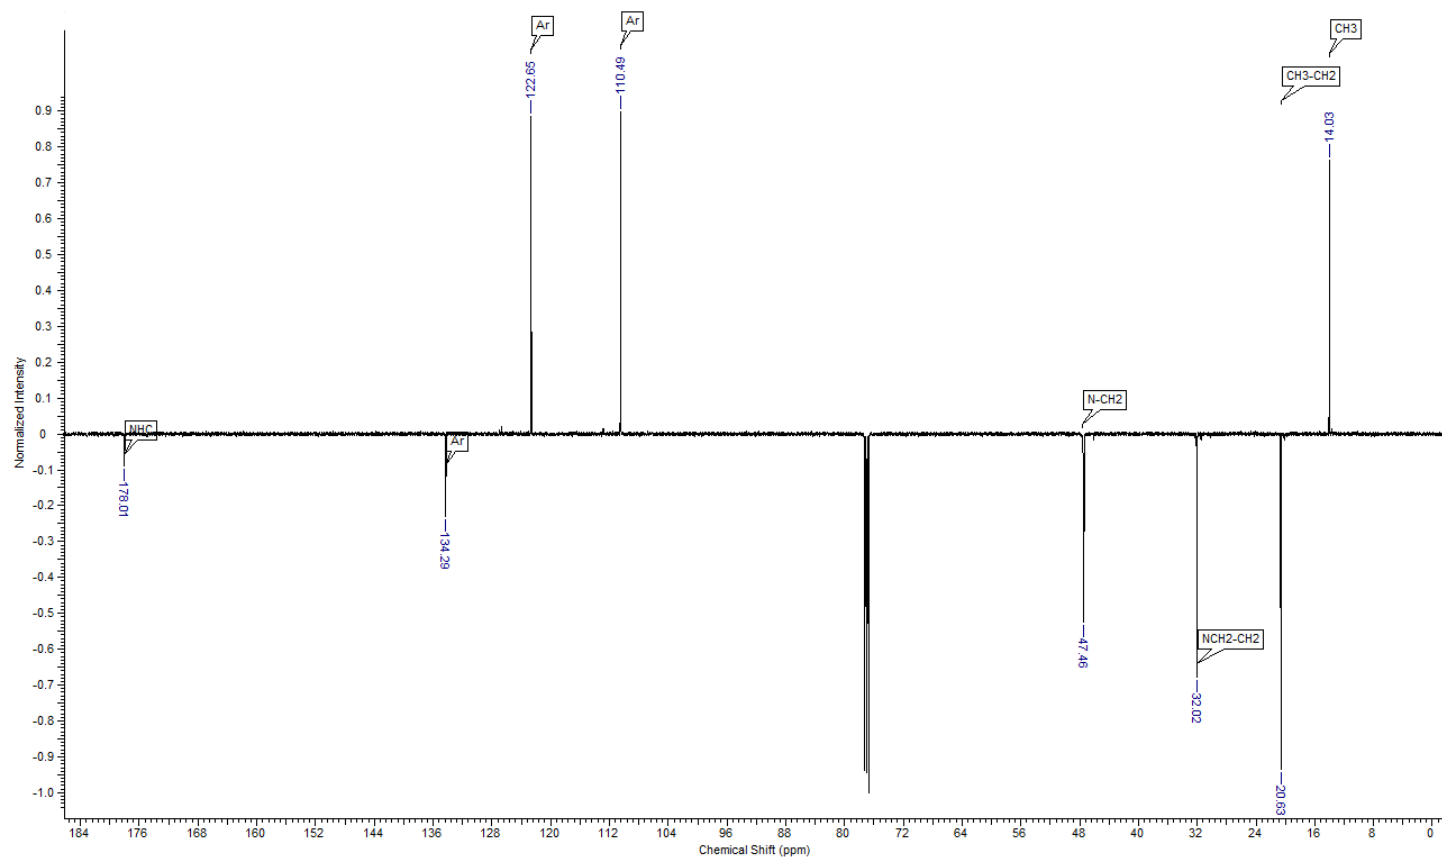

Fig. S 26:  $^{13}\text{C-NMR}$  spectrum (126 MHz,  $\text{CDCl}_3$ ) of complex *trans-2c*.

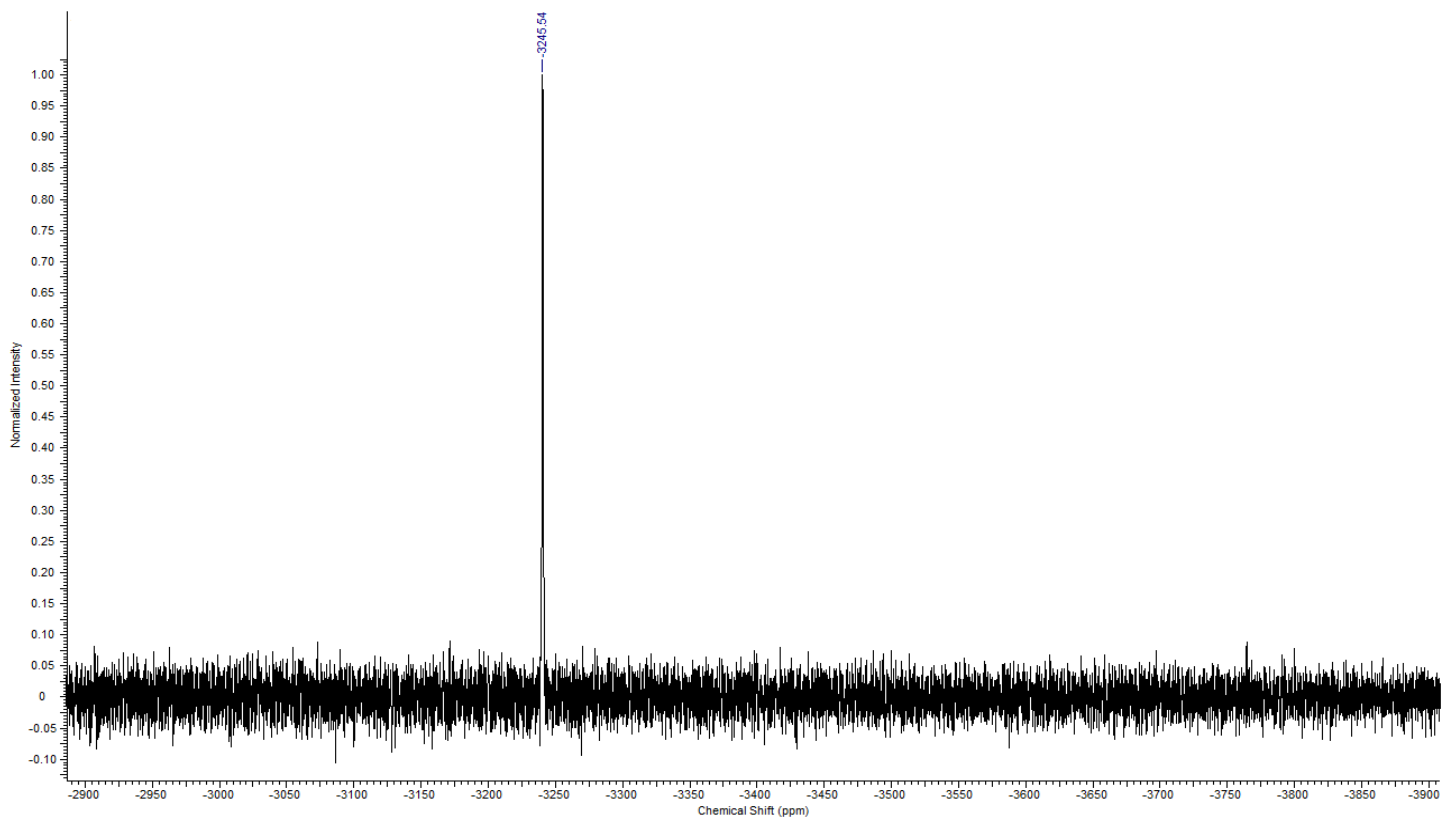

Fig. S 27:  $^{195}\text{Pt}$ -NMR spectrum (108 MHz,  $\text{CDCl}_3$ ) of complex *trans*-2c.

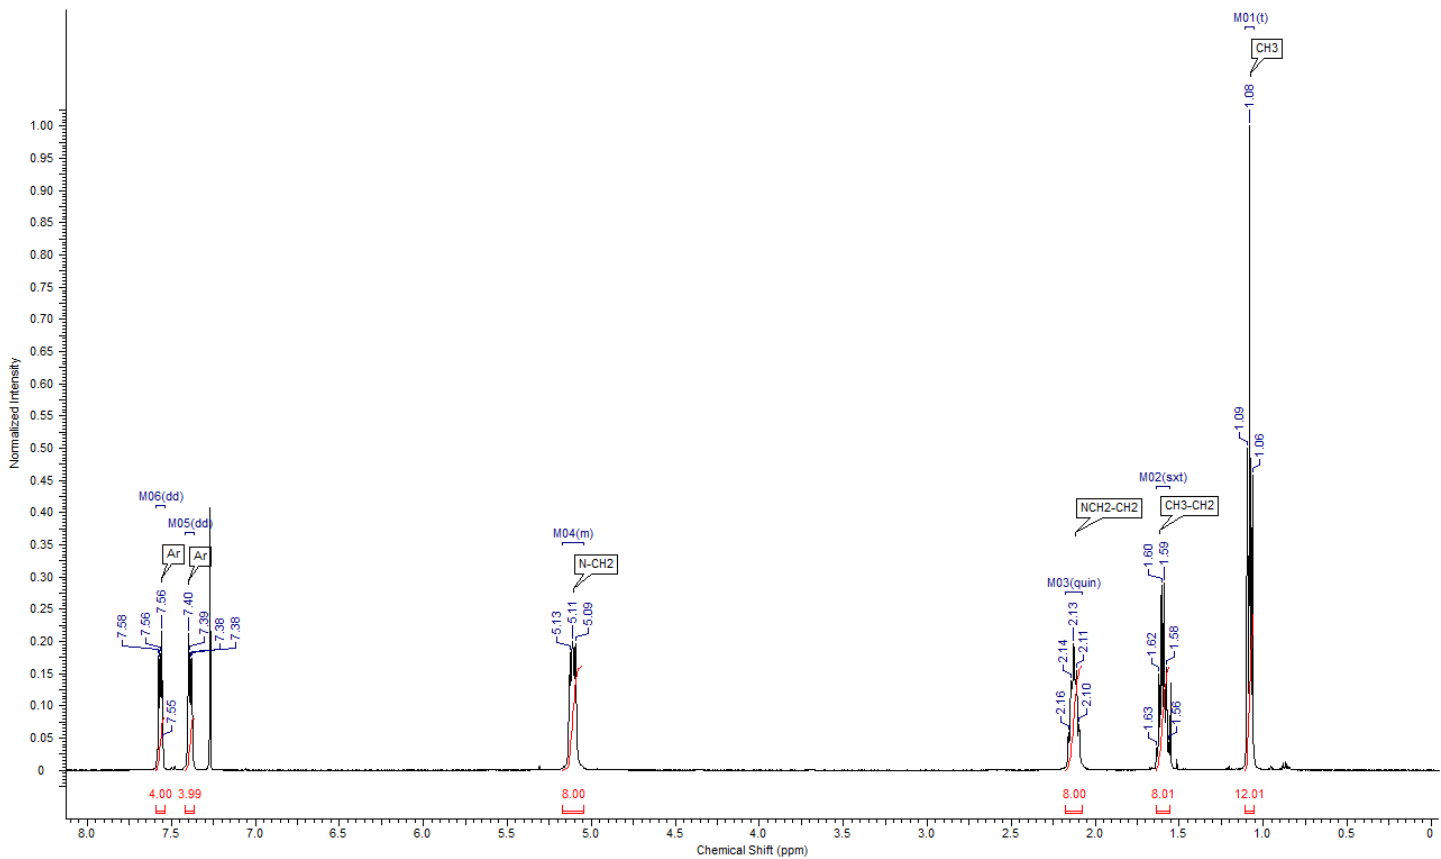

Fig. S 28:  $^1\text{H}$ -NMR spectrum (500 MHz,  $\text{CDCl}_3$ ) of complex *trans*-4c.



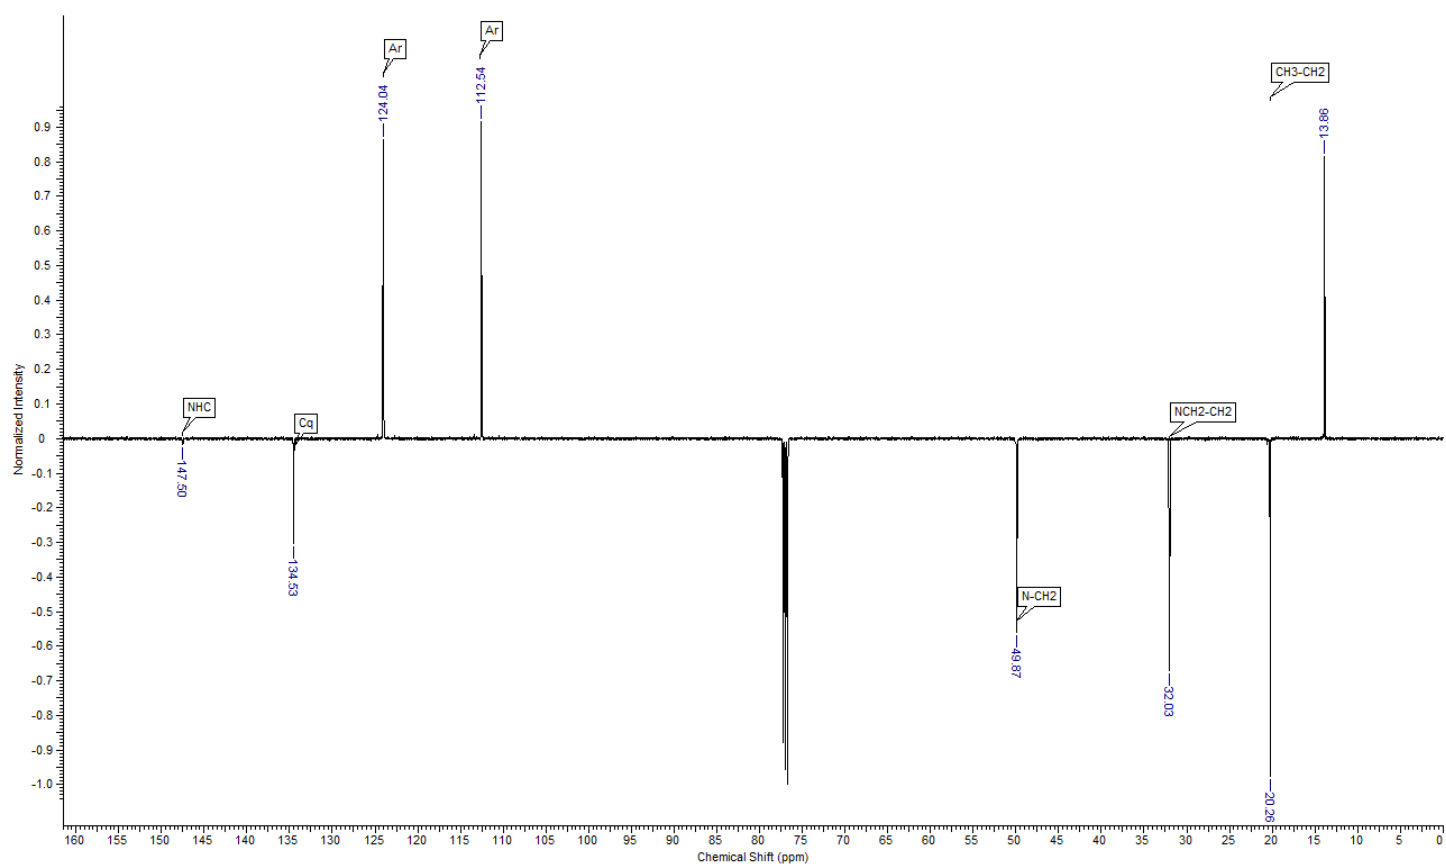

Fig. S 29:  $^{13}\text{C}$ -NMR spectrum (126 MHz,  $\text{CDCl}_3$ ) of complex *trans*-4c.

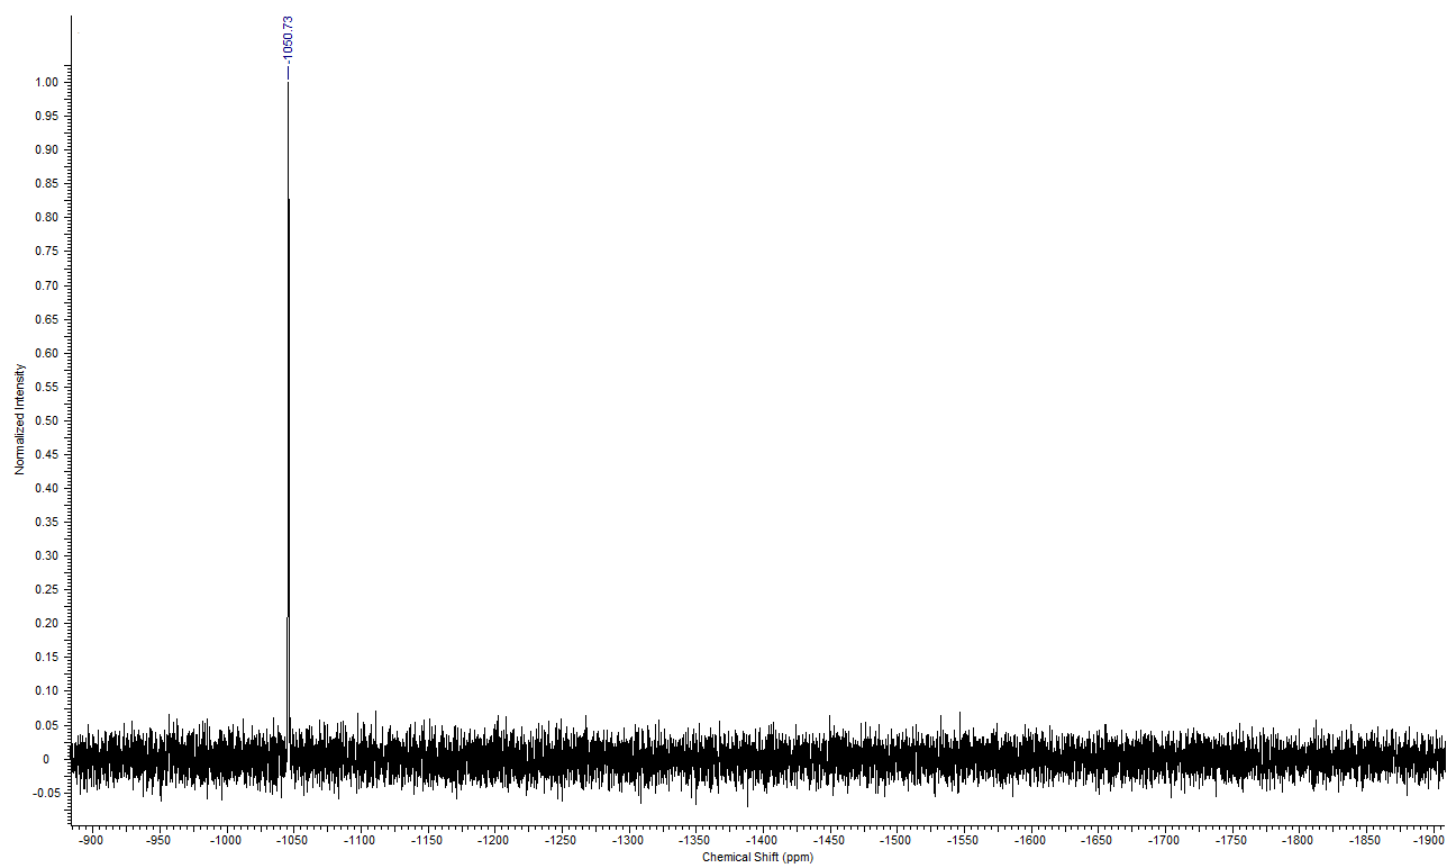

Fig. S 30:  $^{195}\text{Pt}$ -NMR spectrum (108 MHz,  $\text{CDCl}_3$ ) of complex *trans*-4c.

## Oxidation of complex **2b** with NaOCl

Pt<sup>IV</sup> hydroxo complexes with NHC ligands have not been published yet.

Upon treating benzylated complex **1** with H<sub>2</sub>O<sub>2</sub>, a new <sup>195</sup>Pt NMR signal around -855 ppm (CDCl<sub>3</sub>) arose but the reaction was never completed and at the same time accompanied by decomposition due to cleavage of the benzyl group forming benzoic acid.

H<sub>2</sub>O<sub>2</sub> oxidation of the *N*-alkylated benzimidazole-2-ylidene complexes **2** afforded only starting material even with a vast excess of peroxide (H<sub>2</sub>O<sub>2</sub> or <sup>t</sup>BuOOH) at elevated temperatures.

By treating **2b** with NaOCl in water/acetonitrile a new compound with a <sup>195</sup>Pt NMR signal at about -905 ppm (CDCl<sub>3</sub>) appeared, but like before, neither did the reaction go to completion nor was it possible to separate any products from residual starting materials.

In one such run, crystals of a reaction product precipitated from CDCl<sub>3</sub> in the NMR tube. NMR spectra of freshly prepared solutions of these crystals in DMSO-*d*<sub>6</sub> were in agreement with the tentative structure **8** although alternative structures cannot be excluded with certainty. The same sample five days later showed only signals of pure starting Pt<sup>II</sup> complex **2b**.

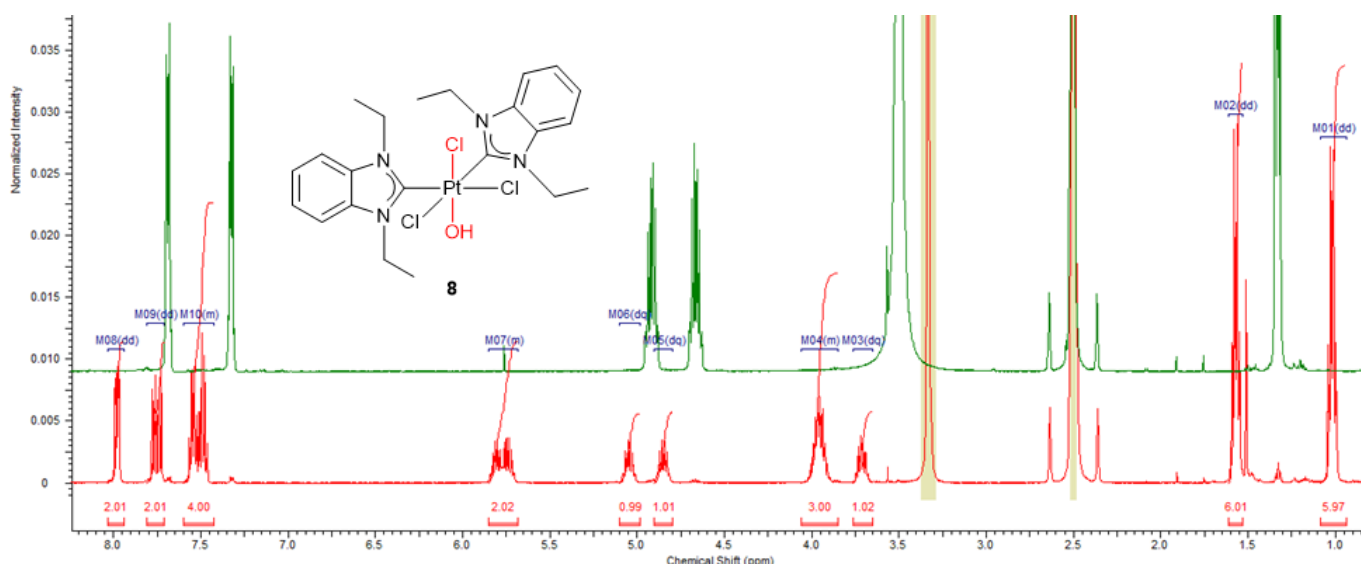

**Fig. S 31 red:** <sup>1</sup>H NMR (DMSO-*d*<sub>6</sub>) of purported Pt<sup>IV</sup> hydroxo complex **8** with characteristic signals of individual N-CH<sub>2</sub> protons between 3.5 and 6.0 ppm caused by inequivalent axial ligands;  
**green:** same sample five days later shows spectrum of starting Pt<sup>II</sup> complex **2b**.

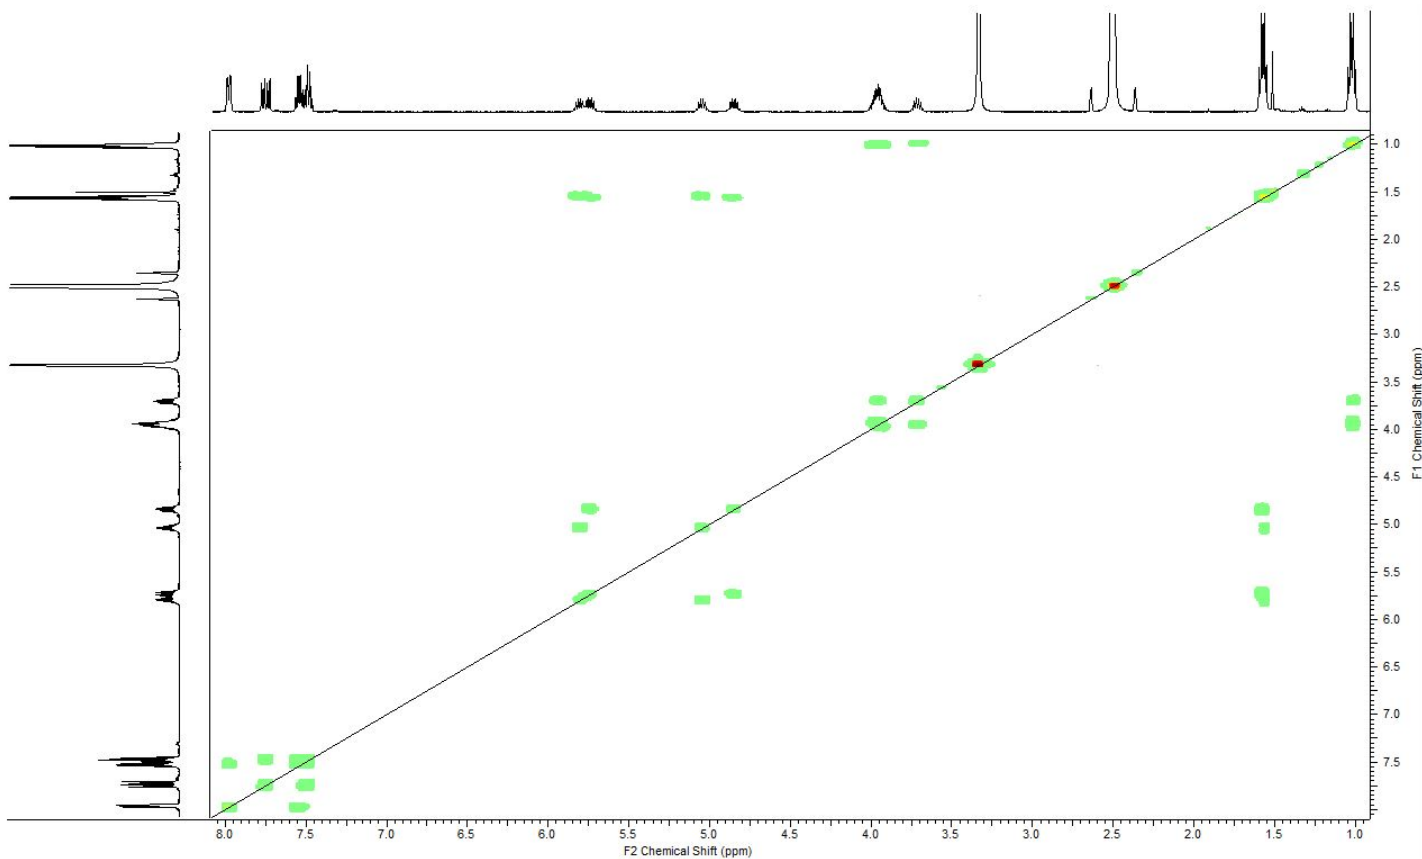

Fig. S 32 COSY-Spectrum of compound **8** in DMSO- $d_6$

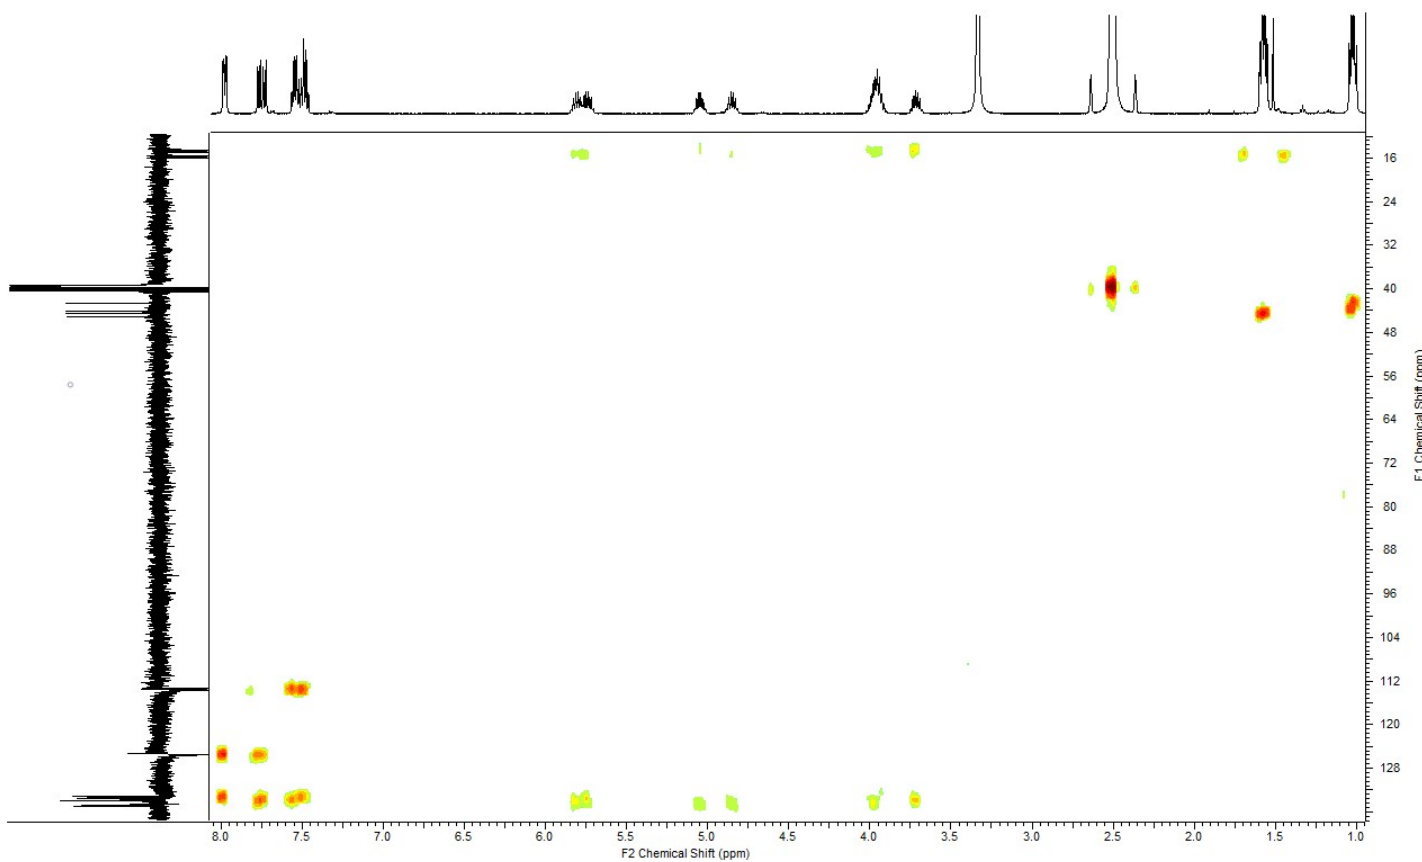

Fig. S 33 HMBC-Spectrum of compound **8** in DMSO- $d_6$

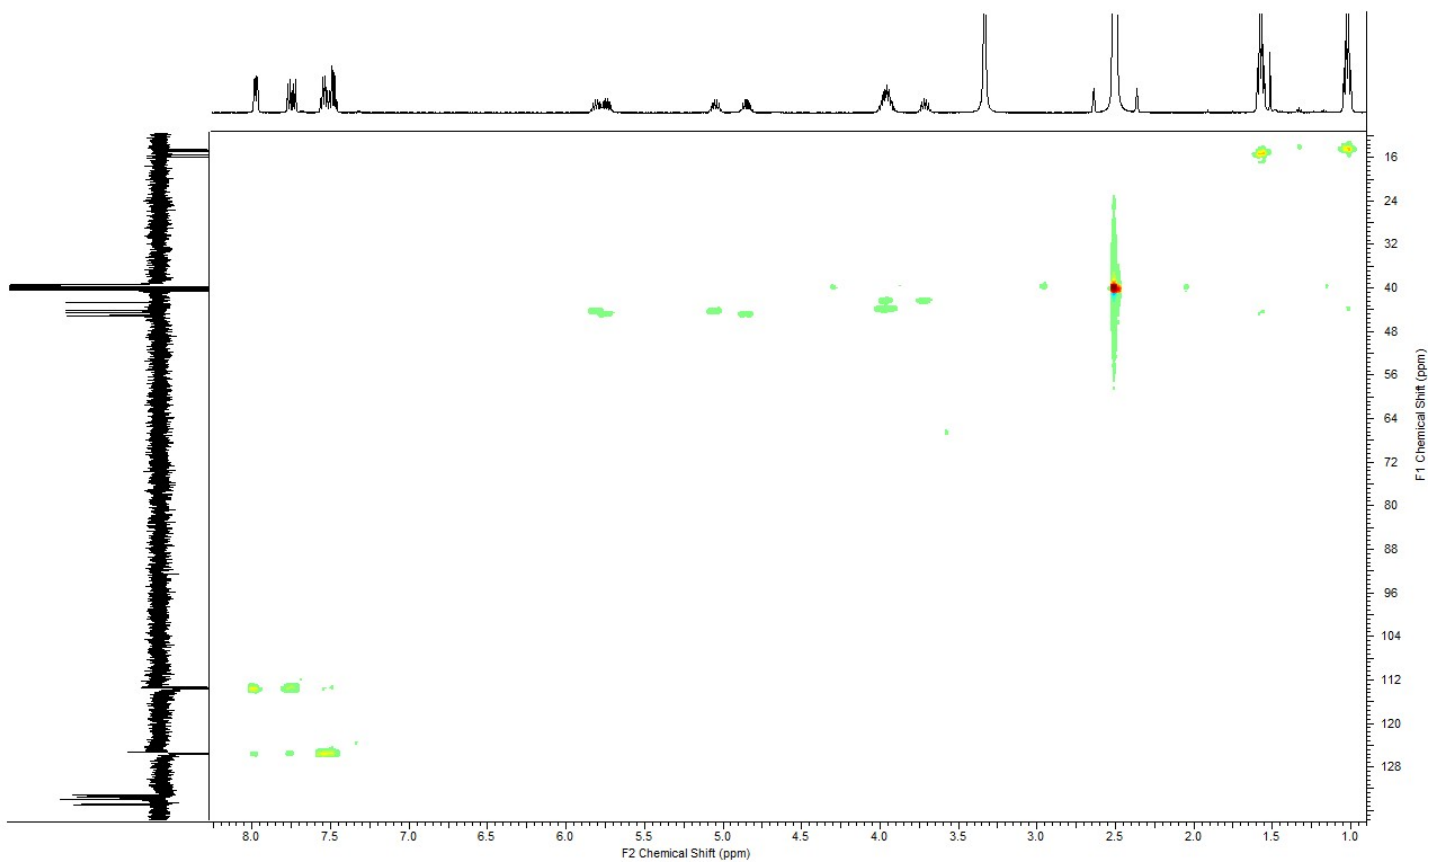

Fig. S 34 HSQC-Spectrum of compound **8** in DMSO- $d_6$

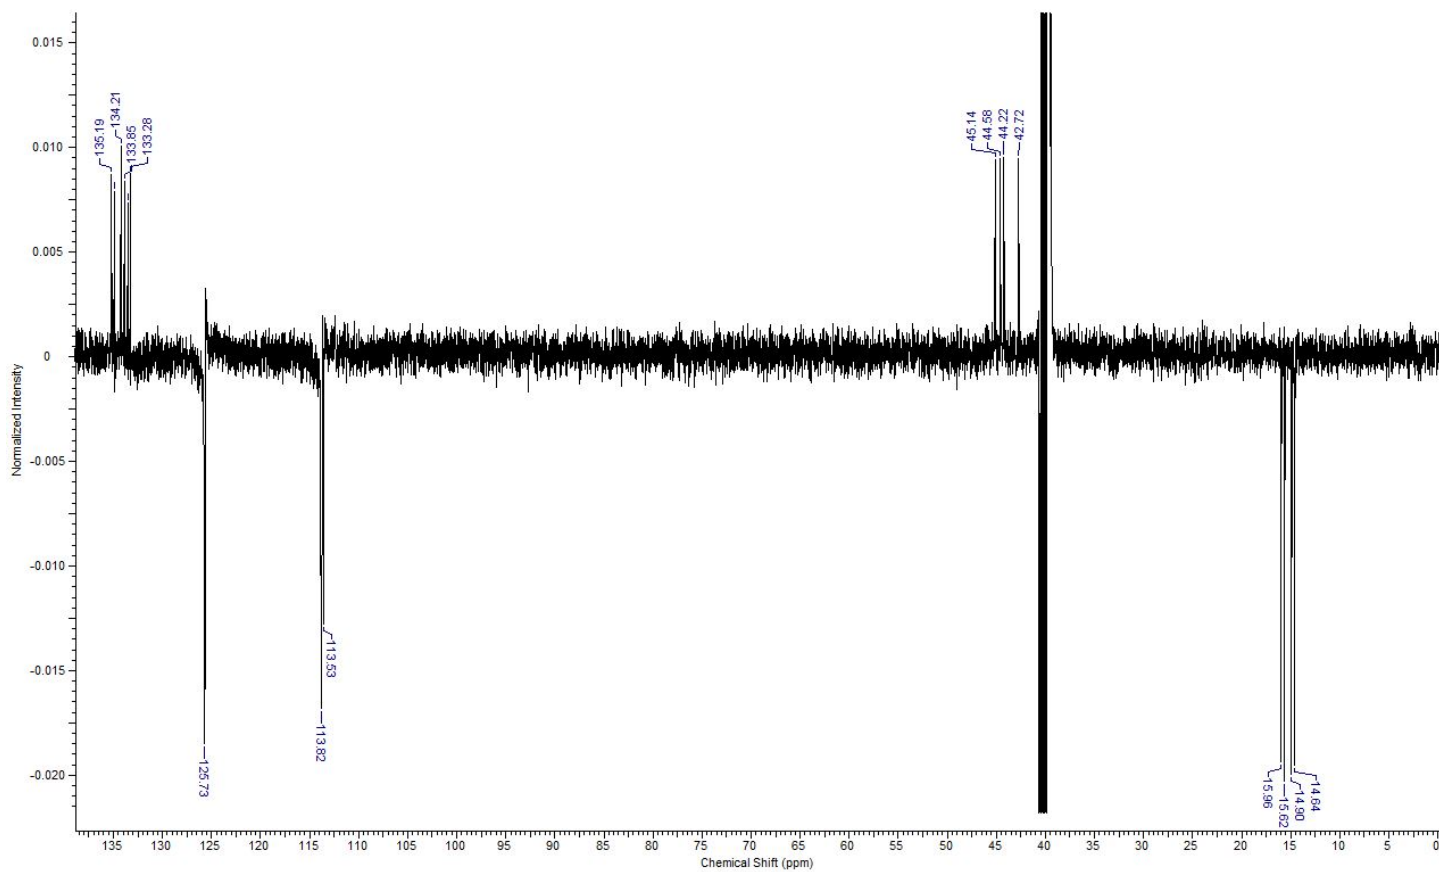

Fig. S 35 JMOL-Spectrum of compound **8** in DMSO- $d_6$

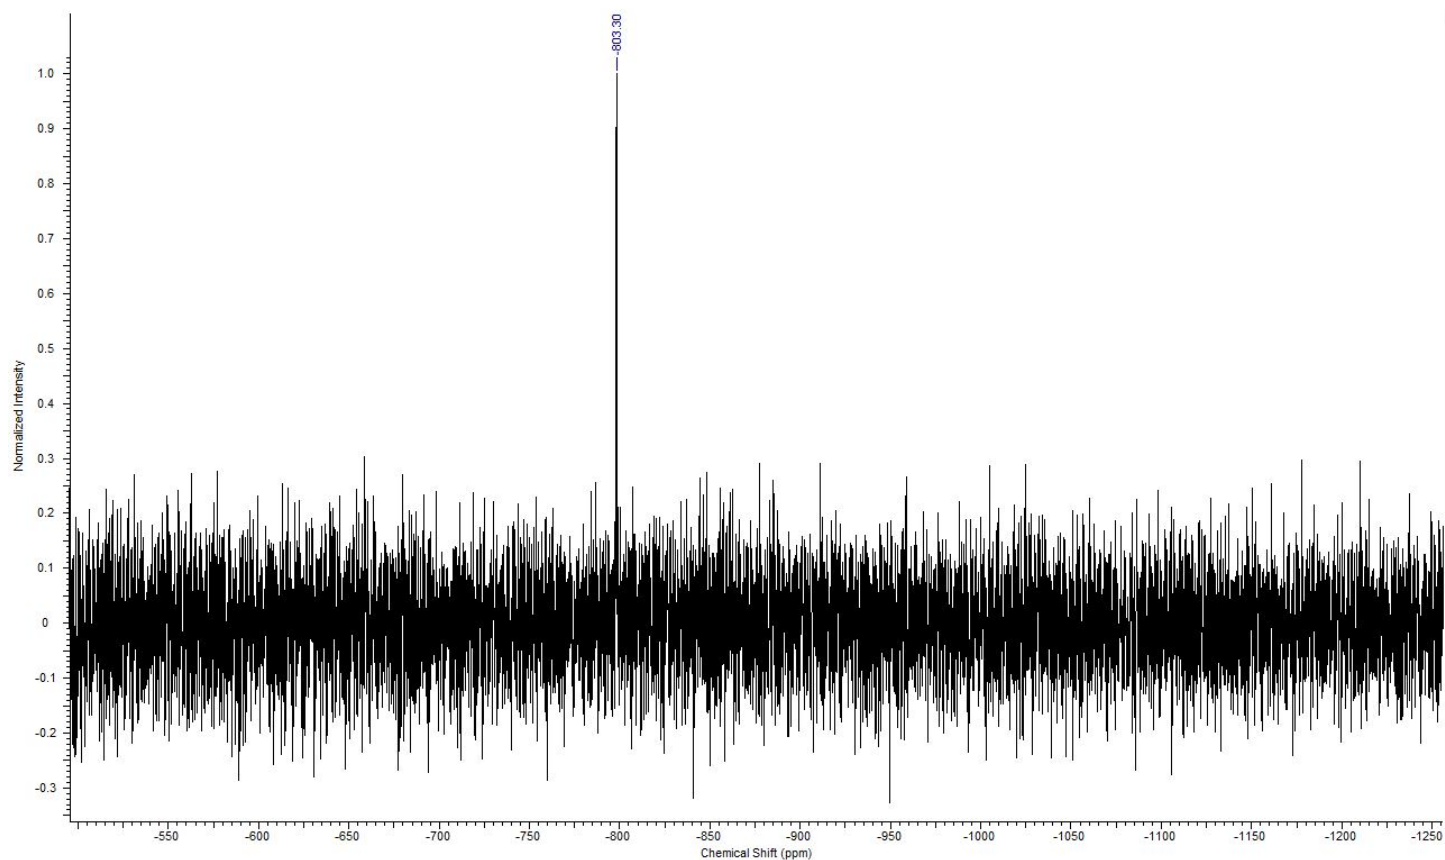

Fig. S 36  $^{195}\text{Pt}$ -Spectrum of compound **8** in  $\text{DMSO-}d_6$

## Stability of complex 4b in DMSO / water

**UV/vis spectra (Fig. S 37):** were recorded of 2 mL of a 25  $\mu$ M solution of complex **4b** (from a 5 mM stock solution in DMSO) in water/DMSO (4:1) over a period of 24 h (every 5 min for the first 3 h) by means of a Cary 60 UV-Vis Spectrometer (Agilent Technologies). Absorptions are relative to a baseline set to 0 at 400 nm.

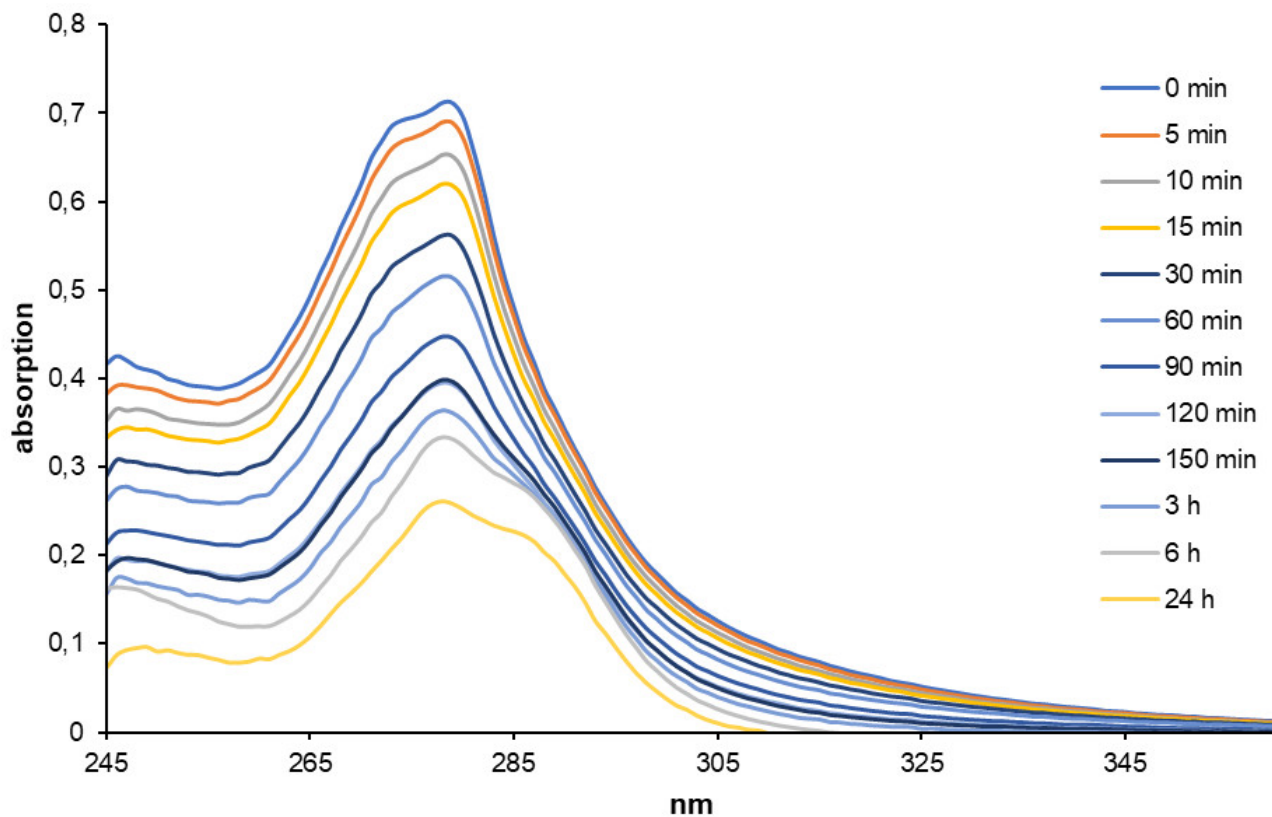

**HPLC–ESI mass spectra:** were recorded on a Varian 1200 Quadrupole MS/MS spectrometer of diluted NMR solutions of complex **4b** in water / DMSO- $d_6$  (30:70) after 0 min, 5 min, 10 min, 15 min, 30 min, 1 h, 2 h, and 16 h. The area of the total ion current (TIC) filtered for the main decomposition species with  $m/z = 579$  was calculated for each of these points in time.

**Exemplary MS after 10 min:**

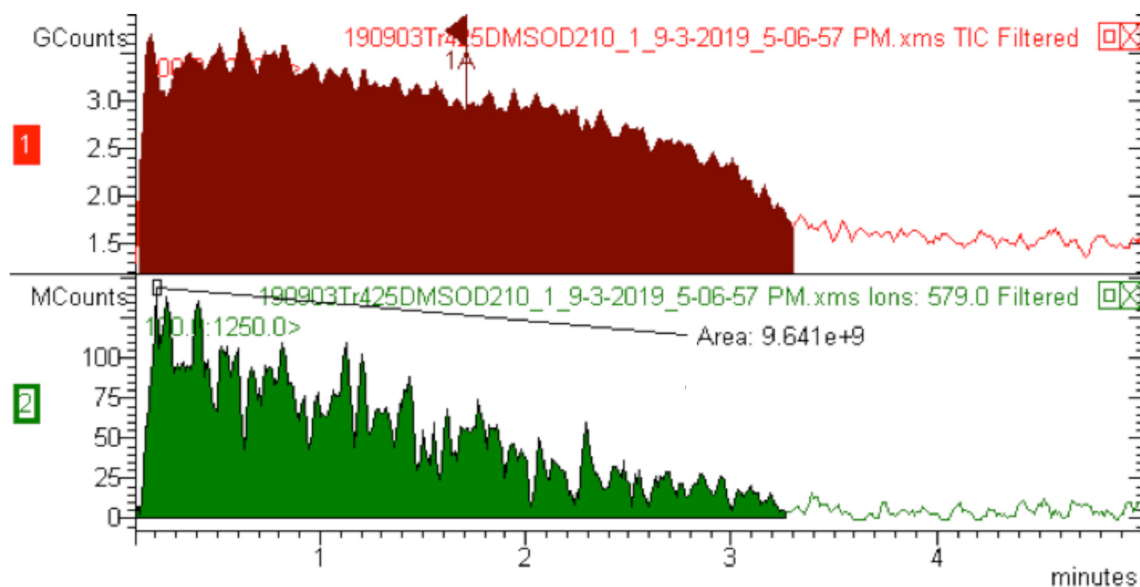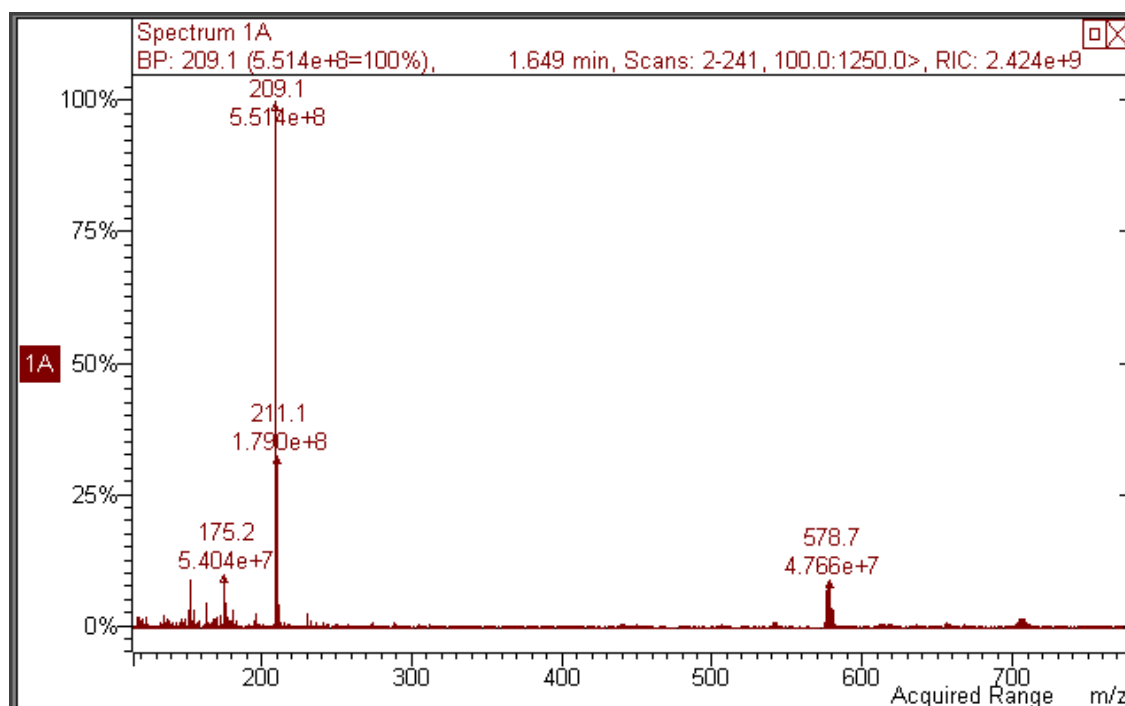

**Fig. S 38:** 1. Top in red: TIC = Total Ion Current from 0-3.2 min;  
2. Middle in green: peak  $m/z = 579$  integrated from 0-3.2 min to give an area of  $9.641 \times 10^9$   
3. Bottom: spectrum 1A, pertinent to TIC from 0-3.2 min.

**Exemplary MS after 16 h:**

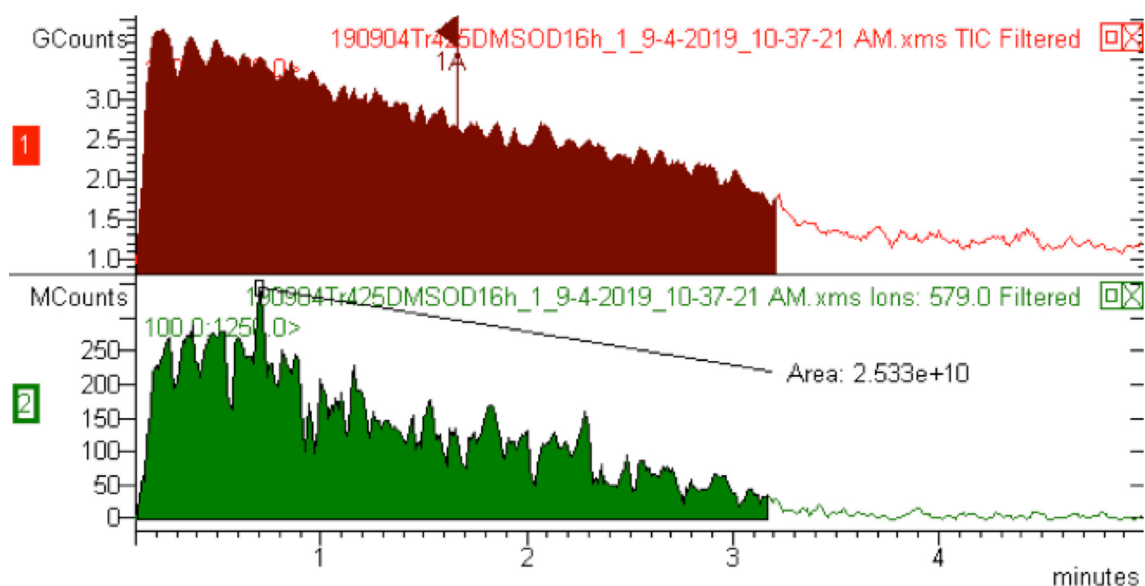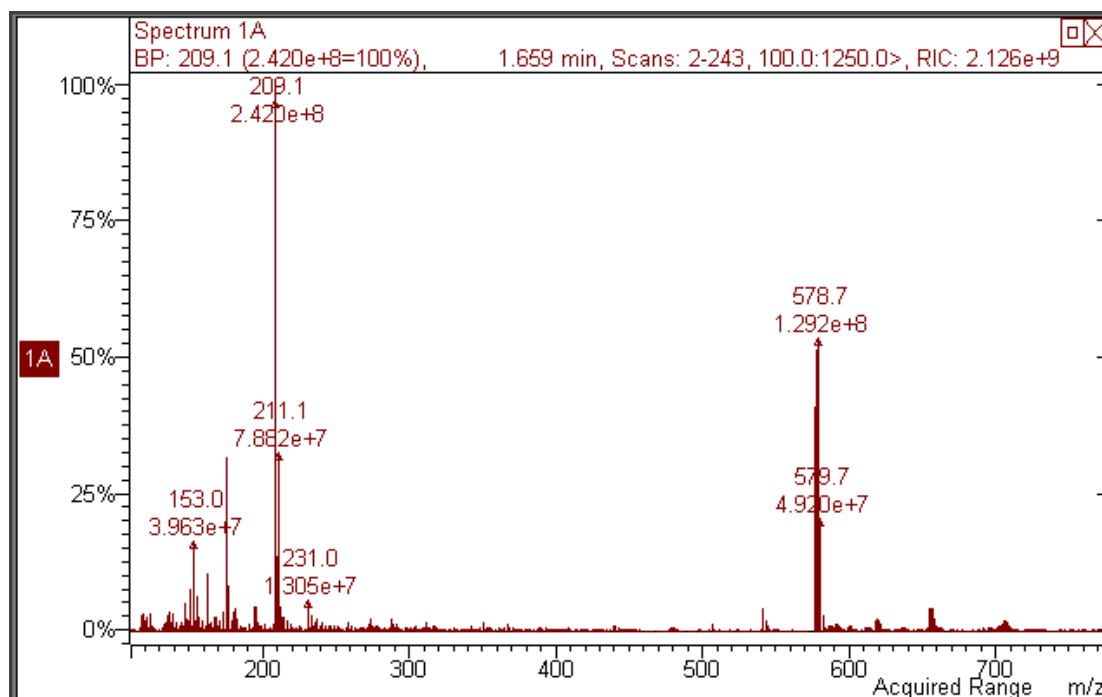

**Fig. S 39:** 1. Top in red: TIC = Total Ion Current from 0-3.2 min;  
 2. Middle in green: peak  $m/z = 579$  integrated from 0-3.2 min to give an area of  $2.533 \times 10^{10}$   
 3. Bottom: spectrum 1A, pertinent to TIC from 0-3.2 min.

**Integration of peak  $m/z = 579$  in spectra from 0-3.2 min recorded over time:**

| Time   | Area                  |
|--------|-----------------------|
| 0 min  | $5.35 \times 10^9$    |
| 5 min  | $8.6 \times 10^9$     |
| 10 min | $9.64 \times 10^9$    |
| 15 min | $1.08 \times 10^{10}$ |
| 30 min | $1.26 \times 10^{10}$ |
| 1 h    | $1.42 \times 10^{10}$ |
| 2 h    | $1.8 \times 10^{10}$  |
| 16 h   | $2.53 \times 10^{10}$ |



**Confirmative MTT-assays with compounds 2c and 2d:** were carried out with cells of the same lines yet of *distinctly different* passage numbers:

**Table S 2:** Means  $\pm$  SD of IC<sub>50</sub> (72 h) values [ $\mu$ M] of complexes **2c** and **2d** in MTT assays against human cancer cell lines<sup>a</sup> as calculated from four independent measurements

| compounds                                 | IC <sub>50</sub> (72h) [ $\mu$ M] |           |
|-------------------------------------------|-----------------------------------|-----------|
|                                           | <b>2c</b> <sup>10b</sup>          | <b>2d</b> |
| <sup>a</sup> <b>518A2</b>                 | 2.1 $\pm$ 0.3                     | > 50      |
| <sup>a</sup> <b>HT29</b>                  | 10.8 $\pm$ 1.0                    | > 50      |
| <sup>a</sup> <b>DLD-1</b>                 | 17.4 $\pm$ 1.0                    | > 50      |
| <sup>a</sup> <b>HCT116</b> <sup>wt</sup>  | 7.0 $\pm$ 0.8                     | > 50      |
| <sup>a</sup> <b>HCT116</b> <sup>-/-</sup> | 5.3 $\pm$ 0.2                     | > 50      |

<sup>a</sup>518A2 – melanoma, HT-29 – colon adenocarcinoma, DLD-1 – Dukes type C colorectal adenocarcinoma, HCT116<sup>wt</sup> – colon carcinoma (wildtype); HCT116<sup>-/-</sup> – colon carcinoma (p53 knock-out mutant).
